# Supplementary material
Source: PubMed Central journal article supplement (PMC6597396)
Supplement: JB.00776-18-s0001.pdf [file JB.00776-18-s0001.pdf]

1681 ---- FHAI ----  
CdiA2\_rD\_V ALALDNRSRSGISGKGAVIDIVSRLENDDGDLLEGRKLKLTAEARNSVRGRGIAARGDLHASVTFAPNQAAGGELSSSEGALMLEADSLDNRSRGGVLSADGNLTVSARRIDNRAGEIASPQGVTLVDAEQDLNRGGKAI GDSGLR  
CdiA2\_rB\_V ALALDNRSRSGISGKGAVIDIVSRLENDDGDLLEGRKLKLTAEARNSVRGRGIAARGDLHASVTFAPNQAAGGELSSSEGALMLEADSLDNRSRGGVLSADGNLTVSARRIDNRAGEIASPQGVTLVDAEQDLNRGGKAI GDSGLR  
CdiA2\_rE\_V ALALDNRSRSGISGKGAVIDIVSRLENDDGDLLEGRKLKLTAEARNSVRGRGIAARGDLHASVTFAPNQAAGGELSSSEGALMLEADSLDNRSRGGVLSADGNLTVSARRIDNRAGEIASPQGVTLVDAEQDLNRGGKAI GDSGLR  
CdiA2\_rC\_V ALALDNRSRSGISGKGAVIDIVSRLENDDGDLLEGRKLKLTAEARNSVRGRGIAARGDLHASVTFAPNQAAGGELSSSEGALMLEADSLDNRSRGGVLSADGNLTVSARRIDNRAGEIASPQGVTLVDAEQDLNRGGKAI GDSGLR  
CdiA1\_rA\_V -----LDNRAGGL-----  
CdiA1\_rA\_II -----LDNRAGGL-----  
clustal -----\*\*\*\*:\*\*\*-----

1821 ---- FHAI ----  
CdiA2\_rD\_V LAAPRVLNQDGGVLSRDLRGLRNGAELFNGNGGLSSQQSIDVLDLGVLGNGAGLSQQRLSVKSGRDLNQQGAVSSAGTSLSSQALNNQGGRRVVDAGAVLRSASLDSNQQGIVSAKGAEEIRTSGLNNSQKGGIG  
CdiA2\_rB\_V LAAPRVLNQDGGVLSRDLRGLRNGAELFNGNGGLSSQQSIDVLDLGVLGNGAGLSQQRLSVKSGRDLNQQGAVSSAGTSLSSQALNNQGGRRVVDAGAVLRSASLDSNQQGIVSAKGAEEIRTSGLNNSQKGGIG  
CdiA2\_rE\_V LAAPRVLNQDGGVLSRDLRGLRNGAELFNGNGGLSSQQSIDVLDLGVLGNGAGLSQQRLSVKSGRDLNQQGAVSSAGTSLSSQALNNQGGRRVVDAGAVLRSASLDSNQQGIVSAKGAEEIRTSGLNNSQKGGIG  
CdiA2\_rC\_V LAAPRVLNQDGGVLSRDLRGLRNGAELFNGNGGLSSQQSIDVLDLGVLGNGAGLSQQRLSVKSGRDLNQQGAVSSAGTSLSSQALNNQGGRRVVDAGAVLRSASLDSNQQGIVSAKGAEEIRTSGLNNSQKGGIG  
CdiA1\_rA\_V -----LSSRSSELNVHGA-----SLDNRGGVLDADAG-----  
CdiA1\_rA\_II -----LSSRSSELNVHGA-----SLDNRGGVLDADAG-----  
clustal -----\*:\*\*: \*.:\*\*:\*\*-----\*:\*\*: \*.:\*\*:\*\*-----

1961 ---- FHAI ----  
CdiA2\_rD\_V SGAGLALVADLVDSNQNGRI TAKGAIDANLKLGLDQQSGRLVSDTAIALDLRGGELVNRAGLIATPGALLLRQLGVVDNSGGGIESDRSFTLAATLALSNRGRVIGSDSLTRIAQALDNLQGVLSASGGDLVAALV  
CdiA2\_rB\_V SGAGLALVADLVDSNQNGRI TAKGAIDANLKLGLDQQSGRLVSDTAIALDLRGGELVNRAGLIATPGALLLRQLGVVDNSGGGIESDRSFTLAATLALSNRGRVIGSDSLTRIAQALDNLQGVLSASGGDLVAALV  
CdiA2\_rE\_V SGAGLALVADLVDSNQNGRI TAKGAIDANLKLGLDQQSGRLVSDTAIALDLRGGELVNRAGLIATPGALLLRQLGVVDNSGGGIESDRSFTLAATLALSNRGRVIGSDSLTRIAQALDNLQGVLSASGGDLVAALV  
CdiA2\_rC\_V SGAGLALVADLVDSNQNGRI TAKGAIDANLKLGLDQQSGRLVSDTAIALDLRGGELVNRAGLIATPGALLLRQLGVVDNSGGGIESDRSFTLAATLALSNRGRVIGSDSLTRIAQALDNLQGVLSASGGDLVAALV  
CdiA1\_rA\_V -----LSATGC-----  
CdiA1\_rA\_II -----LSATGC-----  
clustal -----\*\*\*:\*\*\*-----

2101 ---- FHAI ----  
CdiA2\_rD\_V FDNHSGIVGSKGDTHTHIVNRLENEAGRVVSEGLDLTAKOVSSAKGRIAAKGLDQVTVGTLEQQGGELASQGLTLDADSLDNRRGGLVSDAGGVAEAEARQIDNRGGEISSVAKVALAVREQLDNRRGKVI GDSSELSLTV  
CdiA2\_rB\_V FDNHSGIVGSKGDTHTHIVNRLENEAGRVVSEGLDLTAKOVSSAKGRIAAKGLDQVTVGTLEQQGGELASQGLTLDADSLDNRRGGLVSDAGGVAEAEARQIDNRGGEISSVAKVALAVREQLDNRRGKVI GDSSELSLTV  
CdiA2\_rE\_V FDNHSGIVGSKGDTHTHIVNRLENEAGRVVSEGLDLTAKOVSSAKGRIAAKGLDQVTVGTLEQQGGELASQGLTLDADSLDNRRGGLVSDAGGVAEAEARQIDNRGGEISSVAKVALAVREQLDNRRGKVI GDSSELSLTV  
CdiA2\_rC\_V FDNHSGIVGSKGDTHTHIVNRLENEAGRVVSEGLDLTAKOVSSAKGRIAAKGLDQVTVGTLEQQGGELASQGLTLDADSLDNRRGGLVSDAGGVAEAEARQIDNRGGEISSVAKVALAVREQLDNRRGKVI GDSSELSLTV  
CdiA1\_rA\_V -----AFDNRDGGASGKAGV-----  
CdiA1\_rA\_II -----AFDNRDGGASGKAGV-----  
clustal -----:\*\*:\*\*\*: \*.:\*\*:\*\*-----

2241 ---- FHAI ----  
CdiA2\_rD\_V QRLNLQAKGVLSRDLRGLHLDGAELNNGDGLSSQRLVDVTLGSDLNQGGALVSEGLTVKADQVNNQAGTFSSAGSLLVTSRGELENNQGGRLVTDAGATLNSGTFDNRAGLVSAGKAVAIRTGALNNSQKGSIGGN  
CdiA2\_rB\_V QRLNLQAKGVLSRDLRGLHLDGAELNNGDGLSSQRLVDVTLGSDLNQGGALVSEGLTVKADQVNNQAGTFSSAGSLLVTSRGELENNQGGRLVTDAGATLNSGTFDNRAGLVSAGKAVAIRTGALNNSQKGSIGGN  
CdiA2\_rE\_V QRLNLQAKGVLSRDLRGLHLDGAELNNGDGLSSQRLVDVTLGSDLNQGGALVSEGLTVKADQVNNQAGTFSSAGSLLVTSRGELENNQGGRLVTDAGATLNSGTFDNRAGLVSAGKAVAIRTGALNNSQKGSIGGN  
CdiA2\_rC\_V QRLNLQAKGVLSRDLRGLHLDGAELNNGDGLSSQRLVDVTLGSDLNQGGALVSEGLTVKADQVNNQAGTFSSAGSLLVTSRGELENNQGGRLVTDAGATLNSGTFDNRAGLVSAGKAVAIRTGALNNSQKGSIGGN  
CdiA1\_rA\_V -----  
CdiA1\_rA\_II -----  
clustal -----

2381 ---- FHAI ----  
CdiA2\_rD\_V TGVTVLVAGLVNDGREGRIKSTKGTLDANLKLGLDQQGGSLVGERGVTLDLNNGTLDNHDGLVSTPGALLLRQLGMVDNSVGGIESDRAFTLAANTLNNQGGRLVISEALTRIAKTLDNSLKGQVLTADGLAIESQVLD  
CdiA2\_rB\_V TGVTVLVAGLVNDGREGRIKSTKGTLDANLKLGLDQQGGSLVGERGVTLDLNNGTLDNHDGLVSTPGALLLRQLGMVDNSVGGIESDRAFTLAANTLNNQGGRLVISEALTRIAKTLDNSLKGQVLTADGLAIESQVLD  
CdiA2\_rE\_V AGVTVLVAGLVNDGREGRIKSTKGTLDANLKLGLDQQGGSLVGERGVTLDLNNGTLDNHDGLVSTPGALLLRQLGMVDNSVGGIESDRAFTLAANTLNNQGGRLVISEALTRIAKTLDNSLKGQVLTADGLAIESQVLD  
CdiA2\_rC\_V TGVTVLVAGLVNDGREGRIKSTKGTLDANLKLGLDQQGGSLVGERGVTLDLNNGTLDNHDGLVSTPGALLLRQLGMVDNSVGGIESDRAFTLAANTLNNQGGRLVISEALTRIAKTLDNSLKGQVLTADGLAIESQVLD  
CdiA1\_rA\_V -----  
CdiA1\_rA\_II -----  
clustal -----

2521 ---- FHAI ----  
CdiA2\_rD\_V NRAGIIGSKGDARISVTSLDNAEQGSLVSEGRLELVADQVSNNGQRIAAARGVLEAAVGTLLQQGGELVSGQSLDLRADTLDNSQSGLIAANGGIAIEARQVNDNRAGEISSTKVAVNAREQLDNRRGKVI GDSGLRLTV  
CdiA2\_rB\_V NRAGIIGSKGDARISVTSLDNAEQGSLVSEGRLELVADQVSNNGQRIAAARGVLEAAVGTLLQQGGELVSGQSLDLRADTLDNSQSGLIAANGGIAIEARQVNDNRAGEISSTKVAVNAREQLDNRRGKVI GDSGLRLTV  
CdiA2\_rE\_V NRAGIIGSKGDARISVTSLDNAEQGSLVSEGRLELVADQVSNNGQRIAAARGVLEAAVGTLLQQGGELVSGQSLDLRADTLDNSQSGLIAANGGIAIEARQVNDNRAGEISSTKVAVNAREQLDNRRGKVI GDSGLRLTV  
CdiA2\_rC\_V NRAGIIGSKGDARISVTSLDNAEQGSLVSEGRLELVADQVSNNGQRIAAARGVLEAAVGTLLQQGGELVSGQSLDLRADTLDNSQSGLIAANGGIAIEARQVNDNRAGEISSTKVAVNAREQLDNRRGKVI GDSGLRLTV  
CdiA1\_rA\_V -----RVEVASLRNDQGGKLLSDGRLLDAAANAVGNAG-GRIAAKGLDQATLGSQAQQGGELVSEKTLKVAADTLDNSQSGLIAANGGIAIEARQVNDNRAGEISSTKVAVNAREQLDNRRGKVI GDSGLRLTV  
CdiA1\_rA\_II -----RVEVASLRNDQGGKLLSDGRLLDAAANAVGNAG-GRIAAKGLDQATLGSQAQQGGELVSEKTLKVAADTLDNSQSGLIAANGGIAIEARQVNDNRAGEISSTKVAVNAREQLDNRRGKVI GDSGLRLTV  
clustal -----\*:\*\*: \*.:\*\*:\*\*-----\*:\*\*: \*.:\*\*:\*\*-----

2661 ---- FHAI ----  
CdiA2\_rD\_V QRLNLQAKGVLAGRDGLSDGGELFNGDGGRLDSQNSLSVSLGGVLDNQQGALVSEGLTARAARLDNRGGTFFSSAGALALTSQAALDNQGGRLVSDAGVTLQKASLDNSRSGVISAAGVADIRTVGLDNRNGGIGGNSA  
CdiA2\_rB\_V QRLNLQAKGVLAGRDGLSDGGELFNGDGGRLDSQNSLSVSLGGVLDNQQGALVSEGLTARAARLDNRGGTFFSSAGALALTSQAALDNQGGRLVSDAGVTLQKASLDNSRSGVISAAGVADIRTVGLDNRNGGIGGNSA  
CdiA2\_rE\_V QRLNLQAKGVLAGRDGLSDGGELFNGDGGRLDSQNSLSVSLGGVLDNQQGALVSEGLTARAARLDNRGGTFFSSAGALALTSQAALDNQGGRLVSDAGVTLQKASLDNSRSGVISAAGVADIRTVGLDNRNGGIGGNSA  
CdiA2\_rC\_V QRLNLQAKGVLAGRDGLSDGGELFNGDGGRLDSQNSLSVSLGGVLDNQQGALVSEGLTARAARLDNRGGTFFSSAGALALTSQAALDNQGGRLVSDAGVTLQKASLDNSRSGVISAAGVADIRTVGLDNRNGGIGGNSA  
CdiA1\_rA\_V -----  
CdiA1\_rA\_II -----  
clustal -----

2801 ---- FHAI ----  
CdiA2\_rD\_V GITLVAARLDNQQGQVRSAGKGLLDANLKLGLDQRRGGVLSVETGVTLDLNGGTLVNRDGGIATPGALLLRQLGAVDNGAGGIESDRAFTLAAASLDNRGGRLIGADSLTRIAQALDNLGGVISAAGGLDIAAARLDN  
CdiA2\_rB\_V GITLVAARLDNQQGQVRSAGKGLLDANLKLGLDQRRGGVLSVETGVTLDLNGGTLVNRDGGIATPGALLLRQLGAVDNGAGGIESDRAFTLAAASLDNRGGRLIGADSLTRIAQALDNLGGVISAAGGLDIAAARLDN  
CdiA2\_rE\_V GITLVAARLDNQQGQVRSAGKGLLDANLKLGLDQRRGGVLSVETGVTLDLNGGTLVNRDGGIATPGALLLRQLGAVDNGAGGIESDRAFTLAAASLDNRGGRLIGADSLTRIAQALDNLGGVISAAGGLDIAAARLDN  
CdiA2\_rC\_V GITLVAARLDNQQGQVRSAGKGLLDANLKLGLDQRRGGVLSVETGVTLDLNGGTLVNRDGGIATPGALLLRQLGAVDNGAGGIESDRAFTLAAASLDNRGGRLIGADSLTRIAQALDNLGGVISAAGGLDIAAARLDN  
CdiA1\_rA\_V -----  
CdiA1\_rA\_II -----  
clustal -----

2941 ---- FHAI ----  
CdiA2\_rD\_V SAKGTLASRAGIDLVDGALDHAEGTVSGARLTASASLDNSGKGLLSGNAGLSVATGALDNAEGGQLISQGVLDVSSADLNRGGALSQKQSLRSLAANLDNRGGLTSDGELELTAGRVSDADGGEISARGDLRLTV  
CdiA2\_rB\_V SAKGTLASRAGIDLVDGALDHAEGTVSGARLTASASLDNSGKGLLSGNAGLSVATGALDNAEGGQLISQGVLDVSSADLNRGGALSQKQSLRSLAANLDNRGGLTSDGELELTAGRVSDADGGEISARGDLRLTV  
CdiA2\_rE\_V SAKGTLASRAGIDLVDGALDHAEGTVSGARLTASASLDNSGKGLLSGNAGLSVATGALDNAEGGQLISQGVLDVSSADLNRGGALSQKQSLRSLAANLDNRGGLTSDGELELTAGRVSDADGGEISARGDLRLTV  
CdiA2\_rC\_V SAKGTLASRAGIDLVDGALDHAEGTVSGARLTASASLDNSGKGLLSGNAGLSVATGALDNAEGGQLISQGVLDVSSADLNRGGALSQKQSLRSLAANLDNRGGLTSDGELELTAGRVSDADGGEISARGDLRLTV  
CdiA1\_rA\_V -----  
CdiA1\_rA\_II -----  
clustal -----

3081 ---- FHAI ----  
CdiA2\_rD\_V ERLVQRQRLIGERGVSLDLRGGDLNQQGLISARGPLSIERLNVLDNRQGGIESSQQGFPELLARRIDNQQQRIISAGKRLRDADALGNAGAGLLSGWQGLTVTGGSLDNSAGGTLSSKDGELAISLGGALDNHQGQAL  
CdiA2\_rB\_V ERLVQRQRLIGERGVSLDLRGGDLNQQGLISARGPLSIERLNVLDNRQGGIESSQQGFPELLARRIDNQQQRIISAGKRLRDADALGNAGAGLLSGWQGLTVTGGSLDNSAGGTLSSKDGELAISLGGALDNHQGQAL  
CdiA2\_rE\_V ERLVQRQRLIGERGVSLDLRGGDLNQQGLISARGPLSIERLNVLDNRQGGIESSQQGFPELLARRIDNQQQRIISAGKRLRDADALGNAGAGLLSGWQGLTVTGGSLDNSAGGTLSSKDGELAISLGGALDNHQGQAL  
CdiA2\_rC\_V ERLVQRQRLIGERGVSLDLRGGDLNQQGLISARGPLSIERLNVLDNRQGGIESSQQGFPELLARRIDNQQQRIISAGKRLRDADALGNAGAGLLSGWQGLTVTGGSLDNSAGGTLSSKDGELAISLGGALDNHQGQAL  
CdiA1\_rA\_V -----  
CdiA1\_rA\_II -----  
clustal -----

3221 ---- FHAI ----  
CdiA2\_rD\_V VSKGAQRIDAASLDNAQGI VSGESDVTLISIAKGLDNGQGGLVSAQRLSFERDDTLNNAAGRINNGSLLKLGASLDNSDQGLISQGRDLAII LGGALVNTGAARLASGGDLRLRSASVDNRGKLV SQGLEIISAGSLDN  
CdiA2\_rB\_V VSKGAQRIDAASLDNAQGI VSGESDVTLISIAKGLDNGQGGLVSAQRLSFERDDTLNNAAGRINNGSLLKLGASLDNSDQGLISQGRDLAII LGGALVNTGAARLASGGDLRLRSASVDNRGKLV SQGLEIISAGSLDN  
CdiA2\_rE\_V VSKGAQRIDAASLDNAQGI VSGESDVTLISIAKGLDNGQGGLVSAQRLSFERDDTLNNAAGRINNGSLLKLGASLDNSDQGLISQGRDLAII LGGALVNTGAARLASGGDLRLRSASVDNRGKLV SQGLEIISAGSLDN  
CdiA2\_rC\_V VSKGAQRIDAASLDNAQGI VSGESDVTLISIAKGLDNGQGGLVSAQRLSFERDDTLNNAAGRINNGSLLKLGASLDNSDQGLISQGRDLAII LGGALVNTGAARLASGGDLRLRSASVDNRGKLV SQGLEIISAGSLDN  
CdiA1\_rA\_V -----  
CdiA1\_rA\_II -----  
clustal -----

3361 ---- FHAI ----





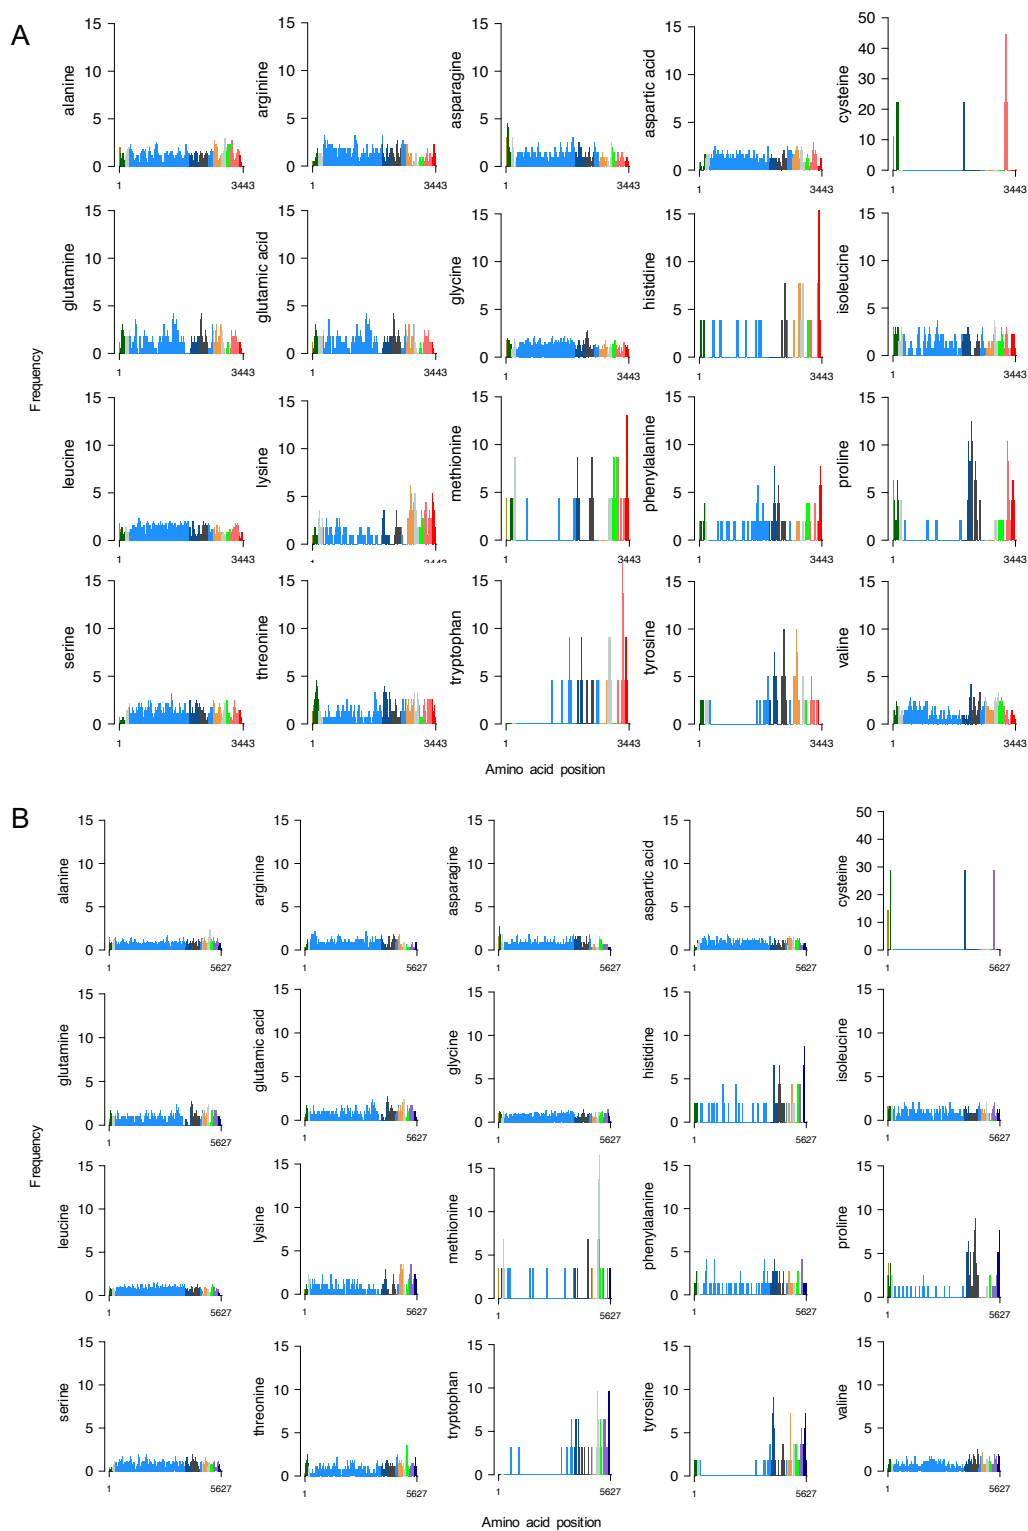

**Figure S2. CdiA2 amino acid residue frequency.** Amino acid frequency plots of (A) CdiA1<sup>PAO1</sup> and (B) CdiA2<sup>PAO1</sup> were determined using a sliding window of 40 residues. Frequency reflects the residue count within the sliding window divided by the total number of occurrences of that residue in CdiA. Colors correspond with protein domains shown in Figure 1C.







1 |----- Cdiol -----  
PABL012 ATGGACATCCGACGCCGCTGAACAGTGCATCGCCCTGTCCCTGGCCGGCATCCTGTTCTCAACCCTGATCGCCGGCGGGGGTGGCGTGGACAAGGCCCGCGGGGCAACACCGCCCTGG  
PABL001 ATGGACATCCGACGCCGCTGAACAGTGCATCGCCCTGTCCCTGGCCGGCATCCTGTTCTCAACCCTGATCGCCGGCGGGGGTGGCGTGGACAAGGCCCGCGGGGCAACACCGCCCTGG  
clustal \*\*\*\*\*  
  
131 |----- Cdiol -----  
PABL012 GCCAGGCGGGCAACGGGGTGGCCATCGTCAATATCGCCACGCCAACGGCGCGGGGTGTGGAACAACATTTCGCGACTACAACGTGCGCGCAACAGGGGTATCCTCAACAACGTACCGGCAAGC  
PABL001 GCCAGGCGGGCAACGGGGTGGCCATCGTCAATATCGCCACGCCAACGGCGCGGGGTGTGGAACAACATTTCGCGACTACAACGTGCGCGCAACAGGGGTATCCTCAACAACGTACCGGCAAGC  
clustal \*\*\*\*\*  
  
261 |----- Cdiol -----  
PABL012 CCAGGGTACCAGTTCGGCGGGATCATCTCGGCAACCCCAACCTCAAGGGCCAGGCGGGGAGTGTCTCAACCAGGTACCAGCGGCAACCGAGCACCTGGCCGGTACACCGAGTGGCCGGG  
PABL001 CCAGGGTACCAGTTCGGCGGGATCATCTCGGCAACCCCAACCTCAAGGGCCAGGCGGGGAGTGTCTCAACCAGGTACCAGCGGCAACCGAGCACCTGGCCGGTACACCGAGTGGCCGGG  
clustal \*\*\*\*\*  
  
391 |----- Cdiol -----  
PABL012 CAGTCGGCGGGGTGATCGTCGCCAACCCGCACGGCATCACCTGCCAGGGTTCGGGCTTCATCAACACCGCGCGGACCTCACCACCGCAAGCCGATATGGACGGCCAGCGCTGGAGCGCTTC  
PABL001 CAGTCGGCGGGGTGATCGTCGCCAACCCGCACGGCATCACCTGCCAGGGTTCGGGCTTCATCAACACCGCGCGGACCTCACCACCGCAAGCCGATATGGACGGCCAGCGCTGGAGCGCTTC  
clustal \*\*\*\*\*  
  
521 |----- Cdiol -----  
PABL012 AGGTGGATGGCGGACATCGTCGTCGAAGGCGCCAACTGAACGTGCGCAACCTCGAACAGTTCGACCTGATCACCAGCGGCAAGCTCAACGCAGGCTACGCGAAGAACCTCAACATCGTCAC  
PABL001 AGGTGGATGGCGGACATCGTCGTCGAAGGCGCCAACTGAACGTGCGCAACCTCGAACAGTTCGACCTGATCACCAGCGGCAAGCTCAACGCAGGCTACGCGAAGAACCTCAACATCGTCAC  
clustal \*\*\*\*\*  
  
651 |----- Cdiol -----  
PABL012 CGGCCGCAACGACGTCAGGCGCAGACGCTGCAGCCACGCGCGCGCCGATGGCAGCGAGAAGCGCAGTGGCGATTGACAGCTCGGCCCTGGCGGGATGTACGCCGGGGCGATCCGCGTGGTC  
PABL001 CGGCCGCAACGACGTCAGGCGCAGACGCTGCAGCCACGCGCGCGCCGATGGCAGCGAGAAGCGCAGTGGCGATTGACAGCTCGGCCCTGGCGGGATGTACGCCGGGGCGATCCGCGTGGTC  
clustal \*\*\*\*\*  
  
781 |----- Cdiol -----  
PABL012 GGCACCGAGCAGGGCTGGGGTGAAGCTGGCGGGGACATGGCCCGCAGCGGGCGGACATCGCATCGACGCCAGCGCAAGCTGAGTCTGGCCAGGCTCCAGCCAGGGCGACCTGAAGATCGCGG  
PABL001 GGCACCGAGCAGGGCTGGGGTGAAGCTGGCGGGGACATGGCCCGCAGCGGGCGGACATCGCATCGACGCCAGCGCAAGCTGAGTCTGGCCAGGCTCCAGCCAGGGCGACCTGAAGATCGCGG  
clustal \*\*\*\*\*  
  
911 |----- Cdiol -----  
PABL012 CCCAGGCGTGGAGTGAATGGCAAGACCTACGCCCGCGCAGCGCCAGATTTCGAGCGCGGAGGAACCTGGTCAACCGGCAGAGCTGGCGGGCGGCAACGCATCGCGCTGGAGCGGGCGATATCGA  
PABL001 CCCAGGCGTGGAGTGAATGGCAAGACCTACGCCCGCGCAGCGCCAGATTTCGAGCGCGGAGGAACCTGGTCAACCGGCAGAGCTGGCGGGCGGCAACGCATCGCGCTGGAGCGGGCGATATCGA  
clustal \*\*\*\*\*  
  
1041 |----- Cdiol -----  
PABL012 CAACCGCGGGTGTGTCGAAGCGCGCTFCGAGCAGACGAGCGGGCAACCGCGCGGGACCTCGAGCTGGCAGCGGCAACCTGGCAGCGGCAACCTGGCAGCGGCAACCTGGCAGCGGCAACCTGGCAGCGG  
PABL001 CAACCGCGGGTGTGTCGAAGCGCGCTFCGAGCAGACGAGCGGGCAACCGCGCGGGACCTCGAGCTGGCAGCGGCAACCTGGCAGCGGCAACCTGGCAGCGGCAACCTGGCAGCGGCAACCTGGCAGCGG  
clustal \*\*\*\*\*  
  
1171 |----- Cdiol -----  
PABL012 GCGAGCCAGGCGCTGGACAACAGGGCGCAGCCTGAAGGGGGCAGCCTCCGGGTGCAGCGGGACCTGGACAACCGTGGCGGCAAGCTGCTCGCCGAGGGGCAACTGCGGGTGAAGCGAGCAGCC  
PABL001 GCGAGCCAGGCGCTGGACAACAGGGCGCAGCCTGAAGGGGGCAGCCTCCGGGTGCAGCGGGACCTGGACAACCGTGGCGGCAAGCTGCTCGCCGAGGGGCAACTGCGGGTGAAGCGAGCAGCC  
clustal \*\*\*\*\*  
  
1301 |----- Cdiol -----  
PABL012 TGGACAACCGCCAGGACGCGCTGTTCGAGCGCGGACCGCGCGTGGTCAAGACCCGTGGCGATTCGACAACCGTGGCGGCAAGCTGATCGCCCTGAACGATCTGGAGTTCGGCGGGCGAGCCTCGA  
PABL001 TGGACAACCGCCAGGACGCGCTGTTCGAGCGCGGACCGCGCGTGGTCAAGACCCGTGGCGATTCGACAACCGTGGCGGCAAGCTGATCGCCCTGAACGATCTGGAGTTCGGCGGGCGAGCCTCGA  
clustal \*\*\*\*\*  
  
1431 |----- Cdiol -----  
PABL012 CAACCGCCAGCAAGGCTGCTCGCAGCCAGCAGTCCACC CGCTCAGCGCCAGCGCGTGGTCAACCGGGGGACGGGCAAGTCTCCGGCAAGCGGCTCGAGGCCCGGCTGGAGCTCGACAATCGC  
PABL001 CAACCGCCAGCAAGGCTGCTCGCAGCCAGCAGTCCACC CGCTCAGCGCCAGCGCGTGGTCAACCGGGGGACGGGCAAGTCTCCGGCAAGCGGCTCGAGGCCCGGCTGGAGCTCGACAATCGC  
clustal \*\*\*\*\*  
  
1561 |----- Cdiol -----  
PABL012 GCGGCAAGCTGATCGCGGACGACCTGCTGGTGGTCGCGCAGCGTGCATCGACAACCGCTCGGCTGTTCTCCGCGCAACCGCTCGACCTGGCGGGCGCAGCCTGGACAACAGCGGCAAGGGCA  
PABL001 GCGGCAAGCTGATCGCGGACGACCTGCTGGTGGTCGCGCAGCGTGCATCGACAACCGCTCGGCTGTTCTCCGCGCAACCGCTCGACCTGGCGGGCGCAGCCTGGACAACAGCGGCAAGGGCA  
clustal \*\*\*\*\*  
  
1691 |----- Cdiol -----  
PABL012 CGCTGAGCAGCGGGCGGCTGGAGTTCAGCCTCGCGGCGCTGCTGGACAACCGCATGAAGGCAACCTGCTCAGCAGGGCGCGCAGCGCTGACGCTGGGGCAACTGGACAACCGCGCGCGGCT  
PABL001 CGCTGAGCAGCGGGCGGCTGGAGTTCAGCCTCGCGGCGCTGCTGGACAACCGCATGAAGGCAACCTGCTCAGCAGGGCGCGCAGCGCTGACGCTGGGGCAACTGGACAACCGCGCGCGGCT  
clustal \*\*\*\*\*  
  
1821 |----- Cdiol -----  
PABL012 GCTGTCGAGCGCAGCGAGTGAACCTFCACGGCGCCAGCTGGACAACCGTGGCGGGCTGCTGGTGGCCAGCGCGGCTGAGCGCCACGGGAGGCGCTTCGACAACCGCGCAGCGGGCAGCGCCAGC  
PABL001 GCTGTCGAGCGCAGCGAGTGAACCTFCACGGCGCCAGCTGGACAACCGTGGCGGGCTGCTGGTGGCCAGCGCGGCTGAGCGCCACGGGAGGCGCTTCGACAACCGCGCAGCGGGCAGCGCCAGC  
clustal \*\*\*\*\*  
  
1951 |----- Cdiol -----  
PABL012 GGCAAGGCTGGCGTGGCGGTGGAGGTTCGCGAGCCTGCGCAACGACAGGGTGGCAAGCTGCTCAGCGATGGCCGCTGGACCTCGCAGCGAACCGCTCGGCAACCGCGGAGGGGCTATCGCCGCCAAGG  
PABL001 GGCAAGGCTGGCGTGGCGGTGGAGGTTCGCGAGCCTGCGCAACGACAGGGTGGCAAGCTGCTCAGCGATGGCCGCTGGACCTCGCAGCGAACCGCTCGGCAACCGCGGAGGGGCTATCGCCGCCAAGG  
clustal \*\*\*\*\*  
  
2081 |----- Cdiol -----  
PABL012 GCGACCTGACGCGAGCCTGGCAGCTGGCCAGCAAGGTGGCGAAGTGGTACGCGAAAAGACCTGAAGTTCGGCGCGACCGCTCGACAACAGCCAGTTCGGGCTGATCGCCGGAATGGCGCAT  
PABL001 GCGACCTGACGCGAGCCTGGCAGCTGGCCAGCAAGGTGGCGAAGTGGTACGCGAAAAGACCTGAAGTTCGGCGCGACCGCTCGACAACAGCCAGTTCGGGCTGATCGCCGGAATGGCGCAT  
clustal \*\*\*\*\*  
  
2211 |----- Cdiol -----  
PABL012 CGCTATCGAGGCGCGGCGAGTTCGACAACCGCGCGCGAGATTTCCAGCACTCGAGGGTTCGCGTGAACCGCCGCGGCAACTGGACAACCGCGCGGCAAGTTCATCGCGCAGCGGCTGCGCCCT  
PABL001 CGCTATCGAGGCGCGGCGAGTTCGACAACCGCGCGCGAGATTTCCAGCACTCGAGGGTTCGCGTGAACCGCCGCGGCAACTGGACAACCGCGCGGCAAGTTCATCGCGCAGCGGCTGCGCCCT  
clustal \*\*\*\*\*  
  
2341 |----- Cdiol -----  
PABL012 ACCGTGACGCGCTGCTGAACAGGCCAAGGGGTGCTGGCCGGCGGACGCGCTGAGCCTGGACGGCGGCAACTGTTCAACGGCGAGCGGGTTCGCTCGACAGCCAGAACGCTGAGCGTGAAGC  
PABL001 ACCGTGACGCGCTGCTGAACAGGCCAAGGGGTGCTGGCCGGCGGACGCGCTGAGCCTGGACGGCGGCAACTGTTCAACGGCGAGCGGGTTCGCTCGACAGCCAGAACGCTGAGCGTGAAGC  
clustal \*\*\*\*\*  
  
2471 |----- Cdiol -----  
PABL012 TCGGCGGCTGCTGGACAACAGGGCGCGCTGGTTCAGCGAAGCGAGCTTCAGCGCGCGCGCGCGGCTGGACAACCGTGGCGGGACCTTCACAGCGCGGTTCGCGCTGACCGCCAGCCAGC  
PABL001 TCGGCGGCTGCTGGACAACAGGGCGCGCTGGTTCAGCGAAGCGAGCTTCAGCGCGCGCGCGCGGCTGGACAACCGTGGCGGGACCTTCACAGCGCGGTTCGCGCTGACCGCCAGCCAGC  
clustal \*\*\*\*\*  
  
2601 |----- Cdiol -----  
PABL012 CGTGTGGACAACAGGGCGGCGAGCTGCTCAGCGATGCGCGGTGACGCTGCAGGGCGCCAGCTCGACAACAGCGGTTCCGCGGTGATCAGCGCAAGGGCGGCTGGATATCCGACCGCGTACTG  
PABL001 CGTGTGGACAACAGGGCGGCGAGCTGCTCAGCGATGCGCGGTGACGCTGCAGGGCGCCAGCTCGACAACAGCGGTTCCGCGGTGATCAGCGCAAGGGCGGCTGGATATCCGACCGCGTACTG  
clustal \*\*\*\*\*  
  
2731 |----- Cdiol -----  
PABL012 GACAACAGCGCAACGGCGCATCGGACGCAACGGCGCATCACCTGGTGGCGCGCGGCTGGACAACGGCCAGCGGCGGGTTCAGCGCAAGGGCTGCTGACGCAACCTGAAAGGCTCGACC



PABL001 clustal GACAACAGCCGCAACGGCGGCATCGGCAGCAACGCCGGCATCACCTGGTGGCCGCCGGCTGGACAACGCCAGCAGGGCCGGTTCAGCGCAACCTGAAAGGCCTCGACC  
\*\*\*\*\*  
2861 ----- Cdiol -----  
PABL012 AGCGCGGAGGGCGGCTCTGGTTCAGCGAAACCGCGCTCACCTCGACCTCAATGGCGGACGCTGGTCAACCGCGAGCGCGGCTGATCGCCAGCCCGGGCGGCTGCTGCGCCAGCTCGCGCGGT  
PABL001 clustal AGCGCGGAGGGCGGCTCTGGTTCAGCGAAACCGCGCTCACCTCGACCTCAATGGCGGACGCTGGTCAACCGCGAGCGCGGCTGATCGCCAGCCCGGGCGGCTGCTGCGCCAGCTCGCGCGGT  
\*\*\*\*\*  
2991 ----- Cdiol -----  
PABL012 GGACAACGGCGCGGGGAAATCTCCAGCGACCGCGCTTACCTTCGCCCGCCGAGCTGGACAACGGCGGGGGCGCTGATCGGCGCCGCGACCTGACCTGCGCATCGCCAGCGCCTGGAC  
PABL001 clustal GGACAACGGCGCGGGGAAATCTCCAGCGACCGCGCTTACCTTCGCCCGCCGAGCTGGACAACGGCGGGGGCGCTGATCGGCGCCGCGACCTGACCTGCGCATCGCCAGCGCCTGGAC  
\*\*\*\*\*  
3121 ----- Cdiol -----  
PABL012 AACAGCTGGCGGGGTGATCTCCGGCGCCCGCGCTGGACATCGCGCGCTCGCTGGACAACAGCGCCAAAGGGCACCTGGCCAGCGCGCGCGCATCGACCTGCGCGTCTGATGGCGGTGGACA  
PABL001 clustal AACAGCTGGCGGGGTGATCTCCGGCGCCCGCGCTGGACATCGCGCGCTCGCTGGACAACAGCGCCAAAGGGCACCTGGCCAGCGCGCGCGCATCGACCTGCGCGTCTGATGGCGGTGGACA  
\*\*\*\*\*  
3251 ----- Cdiol -----  
PABL012 ACCACGCCAAGGCGACCTTTCGGCGCTCGCTGACGCTCGCCAGCGCTCGCTGGACAACAGCGCCAAAGGGCTCTCTCGGCAACGCCCGCTGAGCGTCTGCTGGTGGCGGTGGACAACCGCA  
PABL001 clustal ACCACGCCAAGGCGACCTTTCGGCGCTCGCTGACGCTCGCCAGCGCTCGCTGGACAACAGCGCCAAAGGGCTCTCTCGGCAACGCCCGCTGAGCGTCTGCTGGTGGCGGTGGACAACCGCA  
\*\*\*\*\*  
3381 ----- Cdiol -----  
PABL012 GGGTGGCCAACTGATCAGCAGGCGCTGCTGGAGCTCAGCAGCGCGGACCTCGACAACCGTGGCGCGCCCTCAGTGGCAAGCAGTCTGCGCTGAGCGCCGCAACCTGGACAACCGTGGCGCCTG  
PABL001 clustal GGGTGGCCAACTGATCAGCAGGCGCTGCTGGAGCTCAGCAGCGCGGACCTCGACAACCGTGGCGCGCCCTCAGTGGCAAGCAGTCTGCGCTGAGCGCCGCAACCTGGACAACCGTGGCGCCTG  
\*\*\*\*\*  
3511 ----- Cdiol -----  
PABL012 CTCACGAGCGCGGCAACTGGAAGTTCAGCGCAGCGCGCTGATTCGCCCGAGCGCGCGCAAAATCTCGCCCGGGGCGACTGCGCTGACGCTGAGCGCTGGTGAACCGCAGGGCGCGGTGATCG  
PABL001 clustal CTCACGAGCGCGGCAACTGGAAGTTCAGCGCAGCGCGCTGATTCGCCCGAGCGCGCGCAAAATCTCGCCCGGGGCGACTGCGCTGACGCTGAGCGCTGGTGAACCGCAGGGCGCGGTGATCG  
\*\*\*\*\*  
3641 ----- Cdiol -----  
PABL012 GCGAGCGCGGCTCAGTCTCGACCTGCGGGGCGCGACCTGGACAACAGGGCGCGCTGATCAGTGGCGCGCGCGCTGAGCATCGAGCGGCTGAACGCTCTCGACAACCGCCAGGGCGCGGAGATTC  
PABL001 clustal GCGAGCGCGGCTCAGTCTCGACCTGCGGGGCGCGACCTGGACAACAGGGCGCGCTGATCAGTGGCGCGCGCGCTGAGCATCGAGCGGCTGAACGCTCTCGACAACCGCCAGGGCGCGGAGATTC  
\*\*\*\*\*  
3771 ----- Cdiol -----  
PABL012 CAGCCAGCAGGGCTTCGAGTCTGGCAGGCGCATCGACAACGGCCAGCGGGCGCATCATCAGCGCGGAAACTGCGCTGGACGCCGACGCGCTGGGCAACGCCCGCGCGCGCTGCTCTCCGA  
PABL001 clustal CAGCCAGCAGGGCTTCGAGTCTGGCAGGCGCATCGACAACGGCCAGCGGGCGCATCATCAGCGCGGAAACTGCGCTGGACGCCGACGCGCTGGGCAACGCCCGCGCGCGCTGCTCTCCGA  
\*\*\*\*\*  
3901 ----- Cdiol -----  
PABL012 TGGCAGGCTGACGGTGCAGGCGGGAGCTGGACAACAGCGCCGGCGCACCTTTCGAGCAAGGACGGCGAGCTGGCCATCAGCCTCGGCGCGCGCTGGACAACCGCCAGGGCGCGCTGGTCA  
PABL001 clustal TGGCAGGCTGACGGTGCAGGCGGGAGCTGGACAACAGCGCCGGCGCACCTTTCGAGCAAGGACGGCGAGCTGGCCATCAGCCTCGGCGCGCGCTGGACAACCGCCAGGGCGCGCTGGTCA  
\*\*\*\*\*  
4031 ----- Cdiol -----  
PABL012 GCAAGGGCGCGCAACGGATCGACGCCCGCGCCTGGATAACGCCAGGGCATTTGTCTCGCGGAAAGCAGTGAACCTGAGCATCGCCGGGAAGTGGACAACGCCAGGGCGCGCTGGTCTCGCGCA  
PABL001 clustal GCAAGGGCGCGCAACGGATCGACGCCCGCGCCTGGATAACGCCAGGGCATTTGTCTCGCGGAAAGCAGTGAACCTGAGCATCGCCGGGAAGTGGACAACGCCAGGGCGCGCTGGTCTCGCGCA  
\*\*\*\*\*  
4161 ----- Cdiol -----  
PABL012 GCGCGGCTGAGCTTCGAGCGCGCAGTACGCTGCTGAACAACGCCGGCGCGGATCAACGGCGGCGCCTGCTGCTCAAGGGCGCGCAGCTGGATAACAGCGACGGCCAGTGTATCAGTCAAGGGCGG  
PABL001 clustal GCGCGGCTGAGCTTCGAGCGCGCAGTACGCTGCTGAACAACGCCGGCGCGGATCAACGGCGGCGCCTGCTGCTCAAGGGCGCGCAGCTGGATAACAGCGACGGCCAGTGTATCAGTCAAGGGCGG  
\*\*\*\*\*  
4291 ----- Cdiol -----  
PABL012 CTCGACGCCATCTTCGGCGCGCCTGGTCAACGCCGGCGCGCGCTGGCCAGCGCGCGCGACTGCTGCTGGCAGCGCGCAGCTGACACAACCGCGCGGCAAGCTGGTCAAGCGGGCGCTGGTGG  
PABL001 clustal CTCGACGCCATCTTCGGCGCGCCTGGTCAACGCCGGCGCGCGCTGGCCAGCGCGCGCGACTGCTGCTGGCAGCGCGCAGCTGACACAACCGCGCGGCAAGCTGGTCAAGCGGGCGCTGGTGG  
\*\*\*\*\*  
4421 ----- Cdiol -----  
PABL012 AGATCAGCGCCGGCAGCTCGACAACAGCGCTCCGGCACCTCGCCAGCCAGCGGACATGAGCTTGGCTGGTGGCGCGCGCTCGCAACCGCAGCAGGAGCGCTGATCTTCAGCCAGGGCGGGCG  
PABL001 clustal AGATCAGCGCCGGCAGCTCGACAACAGCGCTCCGGCACCTCGCCAGCCAGCGGACATGAGCTTGGCTGGTGGCGCGCGCTCGCAACCGCAGCAGGAGCGCTGATCTTCAGCCAGGGCGGGCG  
\*\*\*\*\*  
4551 ----- Cdiol -----  
PABL012 CCTCGAGTTCAGGCGCGCAGCTGGACAACCGCGCAGGCGCAGCTCCAGGCCAGGTCGACACCGCTGGTATCGGCGCGCGCTGGACAACCGCGCGCGCTGGACAGCGGGCGCGCAACCTC  
PABL001 clustal CCTCGAGTTCAGGCGCGCAGCTGGACAACCGCGCAGGCGCAGCTCCAGGCCAGGTCGACACCGCTGGTATCGGCGCGCGCTGGACAACCGCGCGCGCTGGACAGCGGGCGCGCAACCTC  
\*\*\*\*\*  
4681 ----- Cdiol -----  
PABL012 GACCTGCAGAGCGCGCAGCTCGACAACCGCGCGCGCGGCGTCAACAGCGCCAAAGGTTGGCTGAAGTGGTACCAGGGCTGTTGCAACAACAGCGCGCGCTCACCCAGCGCGAGTCTGGAGATT  
PABL001 clustal GACCTGCAGAGCGCGCAGCTCGACAACCGCGCGCGCGGCGTCAACAGCGCCAAAGGTTGGCTGAAGTGGTACCAGGGCTGTTGCAACAACAGCGCGCGCTCACCCAGCGCGAGTCTGGAGATT  
\*\*\*\*\*  
4811 ----- Cdiol -----  
PABL012 GCGCGGGCAAGGCGTGGCAACAGCAGCGGCACTCTCTCGCGCTGGCGCGGACACCGCATCTGACCGCGACTTCGACAACCGGGCGCGGCTTACGCGAGCGCGCTGCTCAGCTCGACGG  
PABL001 clustal GCGCGGGCAAGGCGTGGCAACAGCAGCGGCACTCTCTCGCGCTGGCGCGGACACCGCATCTGACCGCGACTTCGACAACCGGGCGCGGCTTACGCGAGCGCGCTGCTCAGCTCGACGG  
\*\*\*\*\*  
4941 ----- Cdiol -----  
PABL012 CCAGCGCTTCTCAACAGGGCGCGCGCGCGCGCAGGGCGGCAAGTTCGGCGCGCGGCGCATCGACTTACGCTGGCGCGCGCTGGCCAACCGCTTCGGCCAGTTGGAAGCGAAAGCGAGTGCAC  
PABL001 clustal CCAGCGCTTCTCAACAGGGCGCGCGCGCGCGCAGGGCGGCAAGTTCGGCGCGCGGCGCATCGACTTACGCTGGCGCGCGCTGGCCAACCGCTTCGGCCAGTTGGAAGCGAAAGCGAGTGCAC  
\*\*\*\*\*  
5071 ----- Cdiol -----  
PABL012 CTGCGCGCGCGCGATCGACAACAGCGCGCGCAGCTGCGCGCCTTGGCGCAGCGCGCAGCAGCGGCTGGTTCGCTGGCGGCTGAACAACGCTTACGGCTGCTGGAAGCGCAACAGGACCTCG  
PABL001 clustal CTGCGCGCGCGCGATCGACAACAGCGCGCGCAGCTGCGCGCCTTGGCGCAGCGCGCAGCAGCGGCTGGTTCGCTGGCGGCTGAACAACGCTTACGGCTGCTGGAAGCGCAACAGGACCTCG  
\*\*\*\*\*  
5201 ----- Cdiol -----  
PABL012 ACCTGCAACTGGCGAGCTGGCCAACCGGTTGGCGCATCTCCACACCGGCAACGGCACTTCGGCTGGATTCCGGGCAAGTATCCGCGCGCGCGGCAACTGACCAACAATGGCTTGGTGGACAT  
PABL001 clustal ACCTGCAACTGGCGAGCTGGCCAACCGGTTGGCGCATCTCCACACCGGCAACGGCACTTCGGCTGGATTCCGGGCAAGTATCCGCGCGCGCGGCAACTGACCAACAATGGCTTGGTGGACAT  
\*\*\*\*\*  
5331 ----- Cdiol -----  
PABL012 CCGCGCGCGGAAAGGCAACAGCAGCGCTGCTGCAAGCCGCGCGCTGAACTGGACATCGGCACTTCGCGCAGAGCGCGGCGGCAAGTCTGGCGGTGAGTCTTCACTGGCGCGCGCGCGAC  
PABL001 clustal CCGCGCGCGGAAAGGCAACAGCAGCGCTGCTGCAAGCCGCGCGCTGAACTGGACATCGGCACTTCGCGCAGAGCGCGGCGGCAAGTCTGGCGGTGAGTCTTCACTGGCGCGCGCGCGCGAC  
\*\*\*\*\*  
5461 ----- Cdiol -----  
PABL012 TGGAGCAACGAGCGCTTGGCCAGCGCAGCGAGCTTGGCACTGAGCTGAGCGCGGCTTACGTTGGCAAGGGCGCGCCACCGCTCGGCGACTTGGCCCTGAAACCGCGCGCGCTCGACCTCGGCA  
PABL001 clustal TGGAGCAACGAGCGCTTGGCCAGCGCAGCGAGCTTGGCACTGAGCTGAGCGCGGCTTACGTTGGCAAGGGCGCGCCACCGCTCGGCGACTTGGCCCTGAAACCGCGCGCGCTCGACCTCGGCA  
\*\*\*\*\*  
5591 ----- Cdiol -----  
PABL012 ATGCCCGCGCTCGCGCGGTCGAATGTACGCTCGCGCGCGCAACTGCTGGTCAACCGTGGCGGATCACCGCGCGCGCGACTCGTGGCCAGCGCGCGGAGCTGGAACAATACGGCACCT

PABL001 clustal ATGCCGCGACCTCGCCGGTGCACATGTACAGCTCGGCCCGGCAACCTGTGGTCAACCGTGGGGGATCACCGCCCGGCGACTCGTGGCCAGCGCCGAGCCTGAACAACACCGCACCT  
\*\*\*\*\*  
5721 ----- CdiAl -----  
PABL012 GGGCGCGCGGCAACCTCGATTGAACCGCCCGCCCTGCTCAACGAGCGCGGGTGTGTTTCAGTGGCGCCGACATGACCTTGGCGCCGGGACATCACCAACCTCTACGGGATGTGTACAGCCTC  
PABL001 clustal GGGCGCGCGGCAACCTCGATTGAACCGCCCGCCCTGCTCAACGAGCGCGGGTGTGTTTCAGTGGCGCCGACATGACCTTGGCGCCGGGACATCACCAACCTCTACGGGATGTGTACAGCCTC  
\*\*\*\*\*  
5851 ----- CdiAl -----  
PABL012 GGCAGCTGGATATCGCCCGCGAGATGCCGGAACCGTGGCCGAGCCTGCGCAACCTTTCCGGGTGATCGAGAGCGCAAGGACTTCAGCCTGCGTGGCAGCCTGATCGAGAACCCTGCGCCGCTGC  
PABL001 clustal GGCAGCTGGATATCGCCCGCGAGATGCCGGAACCGTGGCCGAGCCTGCGCAACCTTTCCGGGTGATCGAGAGCGCAAGGACTTCAGCCTGCGTGGCAGCCTGATCGAGAACCCTGCGCCGCTGC  
\*\*\*\*\*  
5981 ----- CdiAl -----  
PABL012 TGGAAAGCAAGTCGGGCTGTACACCGCGAAGATGGAGCAGACCGCTGCATCGAAGCGGTCAACCGGGGCGACTGCAGCGCAAGCGCAACCGCATCTGGACCATCACCCAGCGCGACAGACCGAGGT  
PABL001 clustal TGGAAAGCAAGTCGGGCTGTACACCGCGAAGATGGAGCAGACCGCTGCATCGAAGCGGTCAACCGGGGCGACTGCAGCGCAAGCGCAACCGCATCTGGACCATCACCCAGCGCGACAGACCGAGGT  
\*\*\*\*\*  
6111 ----- CdiAl -----  
PABL012 CACCGCCAGCAGCCATGGGCAACTGTGGCCGAGGCGACTTCGCCATCGACGGCGGCAACCTTCCAGTCTGATCGGCAGCGCGGCAACCTCACCGCAACCTCGAAGTCTCTGCAC  
PABL001 clustal CACCGCCAGCAGCCATGGGCAACTGTGGCCGAGGCGACTTCGCCATCGACGGCGGCAACCTTCCAGTCTGATCGGCAGCGCGGCAACCTCACCGCAACCTCGAAGTCTCTGCAC  
\*\*\*\*\*  
6241 ----- CdiAl -----  
PABL012 AACAGGGCTTGAACCGCGGAGCTGGAACCATCCCGTGTGCGTACCCTCGCGCGGCGATATCGGCGCATCGACCAAGTTCGCGCAACTTACCAACCTTACTTGTACCAGAGCGCAATT  
PABL001 clustal AACAGGGCTTGAACCGCGGAGCTGGAACCATCCCGTGTGCGTACCCTCGCGCGGCGATATCGGCGCATCGACCAAGTTCGCGCAACTTACCAACCTTACTTGTACCAGAGCGCAATT  
\*\*\*\*\*  
6371 ----- CdiAl -----  
PABL012 TCGACCCGCGCGCGGGCGAGATCCCGCCGCGCTCAACCGGATCTCAGCGACTGTGCTTCAGTACGAATTCCCGAGCAAGGGCGGACCCCGATCAGCAGTGGCGACCACTCTACGACGGT  
PABL001 clustal TCGACCCGCGCGCGGGCGAGATCCCGCCGCGCTCAACCGGATCTCAGCGACTGTGCTTCAGTACGAATTCCCGAGCAAGGGCGGACCCCGATCAGCAGTGGCGACCACTCTACGACGGT  
\*\*\*\*\*  
6501 ----- CdiAl -----  
PABL012 GATCAGGGCCGCGCGGAGCTCACGGTCAATGCCAGCAGCGCATCGACAACCGGCTCACCCGCCCCGGTACACCTTCGTGGCAGCGGGCCGAGTGGGCGACAGCGGCTGGGCGGACGCGGGT  
PABL001 clustal GATCAGGGCCGCGCGGAGCTCACGGTCAATGCCAGCAGCGCATCGACAACCGGCTCACCCGCCCCGGTACACCTTCGTGGCAGCGGGCCGAGTGGGCGACAGCGGCTGGGCGGACGCGGGT  
\*\*\*\*\*  
6631 ----- CdiAl -----  
PABL012 TCGGTGGTCTGCGCGTACCTTCGCAACTGCGCCGCGACTTGGCGCGGCGCAGGTCAACCCGGTACCCCTGCCCGGCTTCAGCTGCCCCAGGTTGACAACGGCTGTTCGGTCTAGCTCGGCTTCG  
PABL001 clustal TCGGTGGTCTGCGCGTACCTTCGCAACTGCGCCGCGACTTGGCGCGGCGCAGGTCAACCCGGTACCCCTGCCCGGCTTCAGCTGCCCCAGGTTGACAACGGCTGTTCGGTCTAGCTCGGCTTCG  
\*\*\*\*\*  
6761 ----- CdiAl -----  
PABL012 CCGAGGACGGCAATGGCAGCGCCGCTCGGTGCGCGCCGAGCCGACCCAGGGCGGTACCGGCTTCGGTGGCCAGCAAGGCGCGGCAACCGCCGCTACCTGGCAGGGCCAGGGCTGCGAGT  
PABL001 clustal CCGAGGACGGCAATGGCAGCGCCGCTCGGTGCGCGCCGAGCCGACCCAGGGCGGTACCGGCTTCGGTGGCCAGCAAGGCGCGGCAACCGCCGCTACCTGGCAGGGCCAGGGCTGCGAGT  
\*\*\*\*\*  
6891 ----- CdiAl -----  
PABL012 CGACGGCTGGCTGGCGCGCAACCTTCAGGGTTCAGGGCGGAGCAGCTCAGCGGTAGCTTCGCGGGCTTCGCGGGTTCAGGGCTTCGCGGCAACCGCACGCGGAGCGCAGCCACAAGTACCTG  
PABL001 clustal CGACGGCTGGCTGGCGCGCAACCTTCAGGGTTCAGGGCGGAGCAGCTCAGCGGTAGCTTCGCGGGTTCGCGGGTTCAGGGCTTCGCGGCAACCGCACGCGGAGCGCAGCCACAAGTACCTG  
\*\*\*\*\*  
7021 ----- CdiAl -----  
PABL012 ATCGAGACCAACCGCGCTCACCGAATGAAGCAGTCTCTCAACTCGGACTACTGCTCAGCGGCTGGGATGAACCCGGAGCATAGCAAGAAGCGTCTCGGCGACGGTCTCTACGAGCAGCGGTGA  
PABL001 clustal ATCGAGACCAACCGCGCTCACCGAATGAAGCAGTCTCTCAACTCGGACTACTGCTCAGCGGCTGGGATGAACCCGGAGCATAGCAAGAAGCGTCTCGGCGACGGTCTCTACGAGCAGCGGTGA  
\*\*\*\*\*  
7151 ----- CdiAl -----  
PABL012 TCCGCGACGGTGGTGGCGCGCACCGGCGAGCGTACATCGACGGCTGAGCAGCGAGGCGCTGTTCGGTACCTGATGGACAACCGCATCGCTTACAAGGACAACCTGCACCTGCAACTGGGTGT  
PABL001 clustal TCCGCGACGGTGGTGGCGCGCACCGGCGAGCGTACATCGACGGCTGAGCAGCGAGGCGCTGTTCGGTACCTGATGGACAACCGCATCGCTTACAAGGACAACCTGCACCTGCAACTGGGTGT  
\*\*\*\*\*  
7281 ----- CdiAl class II -----  
PABL012 GGGCTGAGCGGGAGCAGATGGCGCGCTGACCCAGCATCTGCTGGTGAAGAGGTGAGGTTGAACGGCGAGAAGGTTCTCGCGCGGTGGTCTACCTGGCCAGGCGGAGGTTGGCTGGCACCC  
PABL001 clustal GGGCTGAGCGGGAGCAGATGGCGCGCTGACCCAGCATCTGCTGGTGAAGAGGTGAGGTTGAACGGCGAGAAGGTTCTCGCGCGGTGGTCTACCTGGCCAGGCGGAGGTTGGCTGGCACCC  
-----  
7411 ----- CdiAl class II -----  
PABL012 AACGGTGGCTGATCCAGGCGCGGAGCTGAAGCTGGTGGAGCGCGGACCTGCATAACGTTCGGCACCTTGGCGCGGGAACGACTCTCGCGGACGGCGCAACCTCGACAACAGCGCTGATCG  
PABL001 clustal AACGGTGGCTGATCCAGGCGCGGAGCTGAAGCTGGTGGAGCGCGGACCTGCATAACGTTCGGCACCTTGGCGCGGGAACGACTCTCGCGGACGGCGCAACCTCGACAACAGCGCTGATCG  
-----  
7541 ----- CdiAl class II -----  
PABL012 AGGCGCGCAAGCGCTCGACCTGCTCGCGGCGACTCGATCCGCAACCGCAGGGCGGGTATCGCGGGCTGACGTGAGCCTCACCGCTGACCGGCGAGCTGATCAACGAACGAGCGTACCCG  
PABL001 clustal AGGCGCGCAAGCGCTCGACCTGCTCGCGGCGACTCGATCCGCAACCGCAGGGCGGGTATCGCGGGCTGACGTGAGCCTCACCGCTGACCGGCGAGCTGATCAACGAACGAGCGTACCCG  
-----  
7671 ----- CdiAl class II -----  
PABL012 CTACGACGCGGCTCGACGGCCGACTGGGAACGAGCTTCGCCGACAGCGCCGCGGTTGAGGCGCGGAACAGCTGACGTTCAGCGCGGACGCGACATCGCAACCTCGCGGGTGTCTGCG  
PABL001 clustal CTACGACGCGGCTCGACGGCCGACTGGGAACGAGCTTCGCCGACAGCGCCGCGGTTGAGGCGCGGAACAGCTGACGTTCAGCGCGGACGCGACATCGCAACCTCGCGGGTGTCTGCG  
-----  
7801 ----- CdiAl class II -----  
PABL012 AGCCGCGGCGACTCAGCCTCGACCGCGGAGCGAGCTCACCGTTCGCCCGCTCGAGGACCGCAGGGCGAGCCCGCTGGAGCAGTTCGCGGCTCAGAGCGTTCAGCGCTCGCGCGCGAAGTACGG  
PABL001 clustal AGCCGCGGCGACTCAGCCTCGACCGCGGAGCGAGCTCACCGTTCGCCCGCTCGAGGACCGCAGGGCGAGCCCGCTGGAGCAGTTCGCGGCTCAGAGCGTTCAGCGCTCGCGCGCGAAGTACGG  
-----  
7931 ----- CdiAl class II -----  
PABL012 CCGGGCGGACCTGAACGTGAGCGCGCGGCGACTTTCAGCGCGGTGGCGAGCACCCTGAAGCGCGCGGACATCGCCCTTCGCGCGGCGGAGCTGACCTGGCGCGGCGGCAACGAGGAGCA  
PABL001 clustal CCGGGCGGACCTGAACGTGAGCGCGCGGCGACTTTCAGCGCGGTGGCGAGCACCCTGAAGCGCGCGGACATCGCCCTTCGCGCGGCGGAGCTGACCTGGCGCGGCGGCAACGAGGAGCA  
-----  
8061 ----- CdiAl class II -----  
PABL012 CAGTTCGCCACCGCAAGAAGGTGAGCGCGAAGAAGCATCGGGTGAACACCAATCGACCGTGGTTCAGCGCGGCGGATCTCAGCGTGAAGCGGCAATGAGTGACCTTCGTTCGCAAGTACGGG  
PABL001 clustal CAGTTCGCCACCGCAAGAAGGTGAGCGCGAAGAAGCATCGGGTGAACACCAATCGACCGTGGTTCAGCGCGGCGGATCTCAGCGTGAAGCGGCAATGAGTGACCTTCGTTCGCAAGTACGGG  
-----  
8191 ----- CdiAl class II -----  
PABL012 AAGCCAGCAACGAGGCTATCTGTACCGCGCAACGACTCAATCTGTGGCGGCTCAGCAGGAAAGCTATTCTACTCTCGAAGAAGAAAAGGCTCGTTCGGCGGAGCAGTACCGGATGAGGG  
PABL001 clustal AAGCCAGCAACGAGGCTATCTGTACCGCGCAACGACTCAATCTGTGGCGGCTCAGCAGGAAAGCTATTCTACTCTCGAAGAAGAAAAGGCTCGTTCGGCGGAGCAGTACCGGATGAGGG  
-----  
8321 ----- CdiAl class II -----  
PABL012 AGAGCGAAGCCAGTACCGTGGTGTCTGCTCGATCCAGCGGGCAAGGGCGGAACTGGTGCAGAGCTGACGTCAACCTCGAGGCTCTTCGCGCTCCAGCAGGAAGGGCGAGCTGGCGGTCTGTGC  
PABL001 clustal AGAGCGAAGCCAGTACCGTGGTGTCTGCTCGATCCAGCGGGCAAGGGCGGAACTGGTGCAGAGCTGACGTCAACCTCGAGGCTCTTCGCGCTCCAGCAGGAAGGGCGAGCTGGCGGTCTGTGC  
-----  
8451 ----- CdiAl class II -----  
PABL012 GGGCGCGATGTGAACCTCAGCGAGTGAACAGCTACTCCAGCGTTCGCGGAAATCAAGTCCGGAGGCTTGGGCTGTATCCACAGCAAGGCCAACGCCAGTCTCTTCTTACACCGGTT  
-----

PABL001  
clustal

8581 ----- CdiA1 class II -----  
PABL012 CAGGGCCACAGTGTAGTGGCGATACCACCTGGTGCAGGCGGGAAGGACATCTCGGTGGCCGCCAGCAATGTGGTTTCTACCGGAAGACTGCGTTCGTCGCCGCAACGACATCATCATCGACAGCG  
PABL001  
clustal

8711 ----- CdiA1 class II -----  
PABL012 TGGCGGAGACGTCGGAGTCGCATCGCAGCGAGTCGAAGAAGAAGTCCGGCCTGATGAGTTCGGAGGGATCGGCATCAGCTCGGCACGGCGAAGAATGCCTCGACACAGGACACCCGTACCCTCGTCAA  
PABL001  
clustal

8841 ----- CdiA1 class II -----  
PABL012 CCAGGGCAGCACCATCGGCAGTGTCTCGGCAGTGTGCATGCGGGCGGCAAGAAGTGTCTATCACGGCTTCGGATGTGGTGGCCGCAAGGACATCAACCTCGTCGGCGAGAAGTGTAGCATTTCTC  
PABL001  
clustal

8971 ----- CdiA1 class II -----  
PABL012 GCTGCCGACAACCAGAAGCTCAGCGAGCAGACCCGCAAGACCAGCAAGAGCGGCTTGAGCTGGCCTTGTCCGGAAACGCTCGGTAGCGCAATCGACGCCACCTACCAGAATGCCAAGCAGGCCAGGAAGC  
PABL001  
clustal

9101 ----- CdiA1 class II -----  
PABL012 AAGACGACAGTCGCTTTCCGCTTGCAGGGATCAAGGCCGGCTTGAGCGGCTCCAGGCTGGCAGGCGAGCTCAGCAGAGCGGGCATGACGGGCGAGAACAGCGCGAGTTCGTGGCATCAGCC  
PABL001  
clustal

9231 ----- CdiA1 class II -----  
PABL012 TTCGTGGGCTCGAGAAGTCCAGCTTCGGCAGCGCCAGGAGCAGCAGATCAGCCAGGGAAGCACGCTCACCGCGGTGGCAACTTGAACATTATCGCCACGGTTCCGGGGCTGTCCGGCAAGACGGC  
PABL001  
clustal

9361 ----- CdiA1 class II -----  
PABL012 GACTTGGCGTGAAGGCAGCAAGCTGCAGGCTGGCAAGGACCTCAACTGATGCCAACCCGCGAGCTGTGCTGGAAGCCGCGCAATACGCAGAAGCTCGATGGCAAGAACAAGAGCAGCGGGCGG  
PABL001  
clustal

9491 ----- CdiA1 class II -----  
PABL012 CTGTCCGGTAAGCGTCGGCTTGGTTCGGGCGAGGCTGGCATCAGCATTTTCGCCAACGCCCAACAGGGCGCCGCAAGAAATCGGCAACGGCACCACTGGACCAGAACCCCTGGACGCGGGCA  
PABL001  
clustal

9621 ----- CdiA1 class II -----  
PABL012 GAAGGCCAGTTCGTGAGCGGGCGGACACCAGCTGAAAGGGCGCAGGTCAATGGTGAAGCATCTGGCGAAGTGGTCTGACCTTACCCTGCAAAGCTGCAGGATCGCGATTACTACGATTCC  
PABL001  
clustal

9751 ----- CdiA1 class II -----  
PABL012 AAGCAGAAGAAGCTCGTGGTGGGGGAGTTGGCTATCGTTGGCCAGGGTGGCGCGCAACTTGAGTCTCAGCCAGGCAAGCTGCATTCGAAGTACGACAGCTGCAGGACGAGACCGGGCTGTTCG  
PABL001  
clustal

9881 ----- CdiA1 class II -----  
PABL012 CCGGCAAGGGCGGCTTCCAGTGGAGTGGCAAGCACAGCAGCTGGATGGCAGCTGATCGCCAGCACCCGCGAAGCCGAGAAGAATCGCCTGAGCACAGGCTCCTTGGGCTGGAGCGAGATCCGTAA  
PABL001  
clustal

10011 ----- CdiA1 class II -----  
PABL012 CAAGGCCAGTACAAGAGCAACTTCAGAGTGTAGTGTGAGCAGCGCCAAAGTGGCGCGGTCGCTTCGTGAGCAACATGCCTAGCGGCATGCTCATTGCCTACAACCAGCGCATAGTCCAGCGGT  
PABL001  
clustal

10141 ----- CdiA1 class II -----  
PABL012 ACCACGGGTTCCGGATATCCGAAGGCACCTGGAGTTCGCGATCCGGCGCGCCAGCAACAGGATGTGGCGAGCTCAGCCGTGACCCGAGCGCGCAACGATAGCGTCAGTCCGATCTTCGACAAGG  
PABL001  
clustal

10271 ----- CdiA1 class II -----  
PABL012 AGAAAGAGCAGAAGCGTCTGCAGCAGTCCAAGTATCGGGCAGATCGGCACCCAGGCGATGGATATCTCGCGACGAGGCGCAACTCGACGCCGACAAGCGGCGCGGCGCAACTGGAAGCGGGGG  
PABL001  
clustal

10401 ----- CdiA1 class II -----  
PABL012 TATCTCCGGCCGGACGCGCGCCAGCAAGCGGCAAGTCGAGGACTACCGCAAAGCGTCTTGGGCAAGTGCCTACCAGGACATCATGGGCAAGTACGGCACCGGAGGCGACTACCAGAAGCGCGC  
PABL001  
clustal

10531 ----- CdiA1 class II -----  
PABL012 CAGGCGTGACCGAGCTTGCAGGGCTGGCCGGCGGCAGCATTTGGCTCGCGCTGGCGGGAGCTTCCTCGCCATATGTGGCGGGCTGATCAAGCAGTGGCAGGCGCAATGACACGGCGCGGATCA  
PABL001  
clustal

10661 ----- CdiA1 class II -----  
PABL012 TGGCCATCGGTTCTTGGCGGGTGGTTGCGCAGGCCAGGGCAATTCGGCTGTGCGGGGGCGCAGGAGCGCGGGGAGCGAACTGGCGGCAGGTGATCAGCGAGCGACTGTACGGAAACCCGGGA  
PABL001  
clustal

10791 ----- CdiA1 class II -----  
PABL012 CAGCTCGAGCTGAACGAAGCGCAGAAGCAGACTATCACCGCTGGCCAGCTGGCCGGGATTTGGCCGGCTCCGTTGTGATGGGAGCAGGAGGAGCCATTGGCGGGGCGCAGGCGGGAAGAAC  
PABL001  
clustal

10921 ----- CdiA1 class II -----  
PABL012 GCAACGAAAACAACCTTCCTTGGCGGGGAACCCCGCGGGCTTGATCAGCTATGGTCAGGCGAGCTCCTTGACCGAGTACATGCGCAAGAACGGGGCGCAGCGGAGGAGATCACCCAGGCGCAAC  
PABL001  
clustal

11051 ----- CdiA1 class II -----  
PABL012 GTGATCTGGCCAGGACAGGCTTCGATGGCGTACAGCCAGCGAATGAGTTTCAAGCCCTGGGCGAGGCAATGTTGCGGAAGCTGCCGCTTGGATTGTTGCGGGTTGGGTAGATTGGGTT  
PABL001  
clustal

11181 ----- CdiA1 class II -----  
PABL012 GTGGGTGCAAGGGAGCGACTCCTGTTGTAAGTGTGAGGGGGAATCGGTAAGTATTTACGGATGTTAACCAGAGGGCTAGACAGCAGCCAGGCGAATCCCAACCAACCGACTTGATTGGC  
PABL001  
clustal

11311 ----- CdiA1 class II -----  
PABL012 GATCGAGTGGACGCAAGATAGCGGCTAAGGGGACGCTCACCCGAATGGGAATGCGGATGCTCATGCGAGGATTTGGCGTTATTGCAAGGCATTTAATGAGGTAAAACGGTAGGCTCCGATATGA

```

PABL001
clustal
11441 -----
PABL012 -----
PABL001 -----
clustal

11571 -----
PABL012 -----
PABL001 -----
clustal

11701 -----
PABL012 -----
PABL001 -----
clustal

11831 -----
PABL012 -----
PABL001 -----
clustal

11961 -----
PABL012 -----
PABL001 -----
clustal

12091 -----
PABL012 -----
PABL001 -----
clustal

12221 -----
PABL012 -----
PABL001 -----
clustal

12351 -----
PABL012 -----
PABL001 -----
clustal

12481 -----
PABL012 -----
PABL001 -----
clustal

12611 -----
PABL012 -----
PABL001 -----
clustal

12741 -----
PABL012 -----
PABL001 -----
clustal

12871 -----
PABL012 -----
PABL001 -----
clustal

13001 -----
PABL012 -----
PABL001 -----
clustal

13131 -----
PABL012 -----
PABL001 -----
clustal

13261 -----
PABL012 -----
PABL001 -----
clustal

13391 -----
PABL012 -----
PABL001 -----
clustal

13521 -----
PABL012 -----
PABL001 -----
clustal

13651 -----
PABL012 -----
PABL001 -----
clustal

13781 -----
PABL012 -----
PABL001 -----
clustal

13911 -----
PABL012 -----
PABL001 -----
clustal

14041 -----
PABL012 -----
PABL001 -----
clustal

14171 -----
PABL012 -----

```

----- CdiA1 class II -----

----- CdiI -----

----- CdiI -----

----- CdiI -----

-----

-----

-----

-----

-----

-----

-----

-----

-----

-----

-----

-----

-----

-----

-----

-----

-----

-----

-----

PABL001 clustal 14301 TAGTTTTCCCTGTTACGTAATTTCTTGTCTTTTAAAAAATTTACCTTTTCGATTTAGAAGAAGAGCACCTGCAAGACTCCCTGTCGCCACATCCGCAGAGTCTGAACCCCGGCCCTGTATCCCT

PABL012 clustal 14431 ----- CdiA1 class V ----- GACGGTTCGCTCGCCGGGCAACGCATGCTTTGCTGTTTCCGGCTCGCCCTACAAGGACCAACTGCACCTGCAACTGGGTGGGTCTGAGCGCGGAGCAGATGGCGCGCTGACCCAGCATCGTCT

PABL001 clustal -----TACAAGGACCAACTGCACCTGCAACTGGGTGGGTCTGAGCGCGGAGCAGATGGCGCGCTGACCCAGCATCGTCT \*\*\*\*\*

PABL012 clustal 14561 ----- CdiA1 class V ----- GGCTGGAAGAGGTGAGGTGAACGGCGAGAAGTCTCGCCGGTGGTCTACCTGGCCAGGCGGAGGGTGGCTGGACCCAAAGCTGCGCTGATCCAGGCGCGCAGCTGAAGCTGGTGAACGGCGG

PABL001 clustal GGCTGGAAGAGGTGAGGTGAACGGCGAGAAGTCTCGCCGGTGGTCTACCTGGCCAGGCGGAGGGTGGCTGGACCCAAAGCTGCGCTGATCCAGGCGCGCAGCTGAAGCTGGTGAACGGCGG \*\*\*\*\*

PABL012 clustal 14691 ----- CdiA1 class V ----- CGACTGCATAACGTGCGCACCTGCGCGCGCGGAACGACCTCTCGCGCAGCGCCGCAACCTCGACAACAGCGGCTGATCGAGGCGGCAAGCGCTCGACCTGCTCGCGCGCAGCTCGATCCGCAAC

PABL001 clustal CGACTGCATAACGTGCGCACCTGCGCGCGCGGAACGACCTCTCGCGCAGCGCCGCAACCTCGACAACAGCGGCTGATCGAGGCGGCAAGCGCTCGACCTGCTCGCGCGCAGCTCGATCCGCAAC \*\*\*\*\*

PABL012 clustal 14821 ----- CdiA1 class V ----- CGCCAGGCGGGGTATCGCCGGCGCTGACCTGAGCCTCACCGCGCTGACCGGAGCTGATCAACGAACGAGCTGACCGCTACGACAGCGCGCTCGACGCGCGCACCTGGGAACGACAGCTTCGCGG

PABL001 clustal CGCCAGGCGGGGTATCGCCGGCGCTGACCTGAGCCTCACCGCGCTGACCGGAGCTGATCAACGAACGAGCTGACCGCTACGACAGCGCGCTCGACGCGCGCACCTGGGAACGACAGCTTCGCGG \*\*\*\*\*

PABL012 clustal 14951 ----- CdiA1 class V ----- ACAGCGCGCGGGTGGAGCGCGCAACAGCTGACCTGACCGCGGAGCTGACCTGCGCGGGTGGTGCAGAGCGCGGCGACCTGACCTCGACGCGCGGAGCGAGCTACCGTTCGCG

PABL001 clustal ACAGCGCGCGGGTGGAGCGCGCAACAGCTGACCTGACCGCGGAGCTGACCTGCGCGGGTGGTGCAGAGCGCGGCGACCTGACCTCGACGCGCGGAGCGAGCTACCGTTCGCG \*\*\*\*\*

PABL012 clustal 15081 ----- CdiA1 class V ----- CGCCGTCGAGGACCGCAGGCGCAGACCGCTGAGCAGCTGCGCGCTCCAGAGCATGACCAGCTCGCGCGGAGTCAAGCTGAGCGCGCGGCGGACCTGACCTGAGCGCGCGCGGAGCTTGAACGGCGGTG

PABL001 clustal CGCCGTCGAGGACCGCAGGCGCAGACCGCTGAGCAGCTGCGCGCTCCAGAGCATGACCAGCTCGCGCGGAGTCAAGCTGAGCGCGCGGCGGACCTGACCTGAGCGCGCGCGGAGCTTGAACGGCGGTG \*\*\*\*\*

PABL012 clustal 15211 ----- CdiA1 class V ----- GCCAGCACCTCGAAGCGCGCGGACATCGCCCTCTCGCGGGCGGACGCTGACCTGCGCGGGCGGCAACGAGGAGCATGCTTACAGCAAGACCGAGGAGTCACTACCAGGAAGCAAGTTCG

PABL001 clustal GCCAGCACCTCGAAGCGCGCGGACATCGCCCTCTCGCGGGCGGACGCTGACCTGCGCGGGCGGCAACGAGGAGCATGCTTACAGCAAGACCGAGGAGTCACTACCAGGAAGCAAGTTCG \*\*\*\*\*

PABL012 clustal 15341 ----- CdiA1 class V ----- CCCAGCAAGGACCGCGTGGAGCGCGCGGCGACCTGCGCATCAATGCGCGGACGAGCTGCGCCTGATCGCGAGGCGGCGCGGCGGACGAGGCTACCTGGTGGCGCGGCAAGCTGGAAGT

PABL001 clustal CCCAGCAAGGACCGCGTGGAGCGCGCGGCGACCTGCGCATCAATGCGCGGACGAGCTGCGCCTGATCGCGAGGCGGCGGCGGCGGACGAGGCTACCTGGTGGCGCGGCAAGCTGGAAGT \*\*\*\*\*

PABL012 clustal 15471 ----- CdiA1 class V ----- GCTGGCGCAACGACAGCACTACTACTGTACGACAAGAAGAAGAGCGACTTCGGCGCAAGGAAACCGCGCGGAGCAAGTCAACGAGCTCAAGCGGTGGGCGAGCAGATGACGAGCGCGCG

PABL001 clustal GCTGGCGCAACGACAGCACTACTACTGTACGACAAGAAGAAGAGCGACTTCGGCGCAAGGAAACCGCGCGGAGCAAGTCAACGAGCTCAAGCGGTGGGCGAGCAGATGACGAGCGCGCG \*\*\*\*\*

PABL012 clustal 15601 ----- CdiA1 class V ----- GACCTCACCTGCTCAGCGCGCGGACGACCTACCAGGCGCGAAGCTGGAATCGGGCAACGACTGGCCATCGTACGCGCGCGCGGTGACCTTCGAGGCGGTGAAGGACCTGCACCAGGAAAGCC

PABL001 clustal GACCTCACCTGCTCAGCGCGCGGACGACCTACCAGGCGCGAAGCTGGAATCGGGCAACGACTGGCCATCGTACGCGCGCGCGGTGACCTTCGAGGCGGTGAAGGACCTGCACCAGGAAAGCC \*\*\*\*\*

PABL012 clustal 15731 ----- CdiA1 class V ----- ACGAGAAGAGCAAGGGCGACTGGCGTGAAGCAGCGCAAGGGGAAAGGGCAGACCGATGAAACGCTTCGGCAGACCCAGATCGTGGCCAGGGGAATCTGGCGATCAAGGCGGTGGAAGGGCTGAAGAT

PABL001 clustal ACGAGAAGAGCAAGGGCGACTGGCGTGAAGCAGCGCAAGGGGAAAGGGCAGACCGATGAAACGCTTCGGCAGACCCAGATCGTGGCCAGGGGAATCTGGCGATCAAGGCGGTGGAAGGGCTGAAGAT \*\*\*\*\*

PABL012 clustal 15861 ----- CdiA1 class V ----- CGACCTCAAGCATATCGACCAGAAGCCGTAAGCCAGACCTCGACGCGATGGTGCAGGCGGATTCGCAACTGGCGTGGCTGAAGGAGCCGAGCAGCGCGGGGATGGACTGGCGCATGGTGCAGGAG

PABL001 clustal CGACCTCAAGCATATCGACCAGAAGCCGTAAGCCAGACCTCGACGCGATGGTGCAGGCGGATTCGCAACTGGCGTGGCTGAAGGAGCCGAGCAGCGCGGGGATGGACTGGCGCATGGTGCAGGAG \*\*\*\*\*

PABL012 clustal 15991 ----- CdiA1 class V ----- GTGCAGATAGCTGGAAGTACAGCACTCGGCGATGGGGCGGCGAGCAGATCGTGTGCGCATCGCGCGGAGCCATCGGTGGCATGGCGGAGCGGAGCGCTCAGTGGTGCAGGAGTGGGTGCCA

PABL001 clustal GTGCAGATAGCTGGAAGTACAGCACTCGGCGATGGGGCGGCGAGCAGATCGTGTGCGCATCGCGCGGAGCCATCGGTGGCATGGCGGAGCGGAGCGCTCAGTGGTGCAGGAGTGGGTGCCA \*\*\*\*\*

PABL012 clustal 16121 ----- CdiA1 class V ----- GTAGCTTCGCCATGGCGCAGGAGTGGTGGCGGAGGAGCTGTGCGGCGAGGAGCTGTGCGGCGAGCGGTCAGCCTGATCAACAAGGCGGATCGGGAAGGTGCTGAAAGACAGCTTACGATGACAGCTGAA

PABL001 clustal GTAGCTTCGCCATGGCGCAGGAGTGGTGGCGGAGGAGCTGTGCGGCGAGGAGCTGTGCGGCGAGCGGTCAGCCTGATCAACAAGGCGGATCGGGAAGGTGCTGAAAGACAGCTTACGATGACAGCTGAA \*\*\*\*\*

PABL012 clustal 16251 ----- CdiA1 class V ----- CGAGATGCTATGCGAGCTGACCGGGGGCTGACGGTGAAGTCTCGACGGGATCTTCAGACCAAGACTGATCCGCTTACTGGAAGGTGACGGTAGACCTCAGCAGCTATCTGGTGTGGTTCG

PABL001 clustal CGAGATGCTATGCGAGCTGACCGGGGGCTGACGGTGAAGTCTCGACGGGATCTTCAGACCAAGACTGATCCGCTTACTGGAAGGTGACGGTAGACCTCAGCAGCTATCTGGTGTGGTTCG \*\*\*\*\*

PABL012 clustal 16381 ----- CdiA1 class V ----- TTCGTCGCAATCAGGCGATGCAAGCGTACATCCACTGTACTGAGCCAGGCTTGGGCGAGGGGGAGCTGAAAGGAGCGCTGAAAGGCGGCTTACAAACAGTTTCGCGCGGCGAGGTTCAACT

PABL001 clustal TTCGTCGCAATCAGGCGATGCAAGCGTACATCCACTGTACTGAGCCAGGCTTGGGCGAGGGGGAGCTGAAAGGAGCGCTGAAAGGCGGCTTACAAACAGTTTCGCGCGGCGAGGTTCAACT \*\*\*\*\*

PABL012 clustal 16511 ----- CdiA1 class V ----- TCGTCGCGGATATCGCCAGGAATACAGCTGAAGCGAGGCTCTCGATGTTGACCATGACCGCTGATGGTGGCTTGGCGCGAGGTCAGCGGTGGCGATTTCCGCAAGGGCGCGCGCGCG

PABL001 clustal TCGTCGCGGATATCGCCAGGAATACAGCTGAAGCGAGGCTCTCGATGTTGACCATGACCGCTGATGGTGGCTTGGCGCGAGGTCAGCGGTGGCGATTTCCGCAAGGGCGCGCGCGCG \*\*\*\*\*

PABL012 clustal 16641 ----- CdiA1 class V ----- TGGCGCAATGAAGCGTGGTGGCAAGTAGACAGGCTTCAAGAGCTGAGCCCTGAGAACCGTGAAGCCATGGTCACTATGGGGTTCGCAATGGTGGTGGTTCGCTGCGCGGTACGCGATCT

PABL001 clustal TGGCGCAATGAAGCGTGGTGGCAAGTAGACAGGCTTCAAGAGCTGAGCCCTGAGAACCGTGAAGCCATGGTCACTATGGGGTTCGCAATGGTGGTGGTTCGCTGCGCGGTACGCGATCT \*\*\*\*\*

PABL012 clustal 16771 ----- CdiA1 class V ----- GATGTGACAGGCAAGCTCTGGAAGCGCTGCTTGGGTAGCGAAGACTCGACCAATACAACTTCTCAACCATCAGATGTTGGCGGATCTGGATAATGCTTTCAGAAATGCAAGTCCAGGAAAT

PABL001 clustal GATGTGACAGGCAAGCTCTGGAAGCGCTGCTTGGGTAGCGAAGACTCGACCAATACAACTTCTCAACCATCAGATGTTGGCGGATCTGGATAATGCTTTCAGAAATGCAAGTCCAGGAAAT \*\*\*\*\*

PABL012 clustal 16901 ----- CdiA1 class V ----- GCCGTGAGGTAGAGGAGTTCGAAGCGCTGAGCAGGAGAACCGCGGAGGTTGAATGGCTGCTGGCTGGGTAATGGCGGAGATTCGTCGGGAGATCGATGCGGGGTCTACGGCTCTCAACGA

PABL001 clustal GCCGTGAGGTAGAGGAGTTCGAAGCGCTGAGCAGGAGAACCGCGGAGGTTGAATGGCTGCTGGCTGGGTAATGGCGGAGATTCGTCGGGAGATCGATGCGGGGTCTACGGCTCTCAACGA \*\*\*\*\*

PABL012 clustal 17031 ----- CdiA1 class V ----- GCTGGTGGCGCGGAGAACAGCTAATCCGGGAGGAGTACGCGGATATAGCTACGGTTTCTGATGGCGGAAATGTTGTCGACTGGACGACGGCTGGTCACTGACCTGGAGCAGACCGCAAC

```

PABL001      GCTGGTGGCCCGCAGGAAACAGTAAATCCGGGAGGAAGTGACAGCGATATAGCCTACGGTTTCTGTATGGGCCGAAATGTTGTCGACTGGACGACGGTGGTCAAGTGCACCTGGAGCAGACCGCCAAC
clustal      *****

17161 ----- CdiA1 class V -----
PABL012      CTCGTGGTGGAAACGTAATCCACAGTGGCAGAGGAAGTCGGTGCATACCTGGACAGACGGGGTTCAATCCGTTCCGGAATCGGCGTTCCGGCAATGGGCGGTGCCGTGGCAAGGTAACGGCCAAGGCCG
PABL001      CTCGTGGTGGAAACGTAATCCACAGTGGCAGAGGAAGTCGGTGCATACCTGGACAGACGGGGTTCAATCCGTTCCGGAATCGGCGTTCCGGCAATGGGCGGTGCCGTGGCAAGGTAACGGCCAAGGCCG
clustal      *****

17291 ----- CdiA1 class V -----
PABL012      TCATGAATGCCGTGAAGGCGGAGAGTTGCCCAAAGGAGAGGTGGCCCCAGGAAAGGCTAATCTGCCTACCATTGGGGCGTTGGCGGATGCTGAGGCGGGAATGCCTTATACCCATCCAGTTAAGCTTCGC
PABL001      TCATGAATGCCGTGAAGGCGGAGAGTTGCCCAAAGGAGAGGTGGCCCCAGGAAAGGCTAATCTGCCTACCATTGGGGCGTTGGCGGATGCTGAGGCGGGAATGCCTTATACCCATCCAGTTAAGCTTCGC
clustal      *****

17421 ----- CdiA1 class V -----
PABL012      CGCAAAGCGACTGGGACAGCAGGGAAGATTAAAGATTGAAGCCGGCCAAATACCTGACGCAAAATGAAGTACGTCGAGGACAAAGGTTATCTGGTCTTGGGTACGATGTTACGCACCAAACCACTGGCTCA
PABL001      CGCAAAGCGACTGGGACAGCAGGGAAGATTAAAGATTGAAGCCGGCCAAATACCTGACGCAAAATGAAGTACGTCGAGGACAAAGGTTATCTGGTCTTGGGTACGATGTTACGCACCAAACCACTGGCTCA
clustal      *****

17551 ----- CdiA1 class V -----
PABL012      GCTAAAGGTATCAAGGGCAGCGAACTGCGGACTTGCATGTTGATGGACTCGGTTCCATTGATGTGTATACGCCGAAGAGTCTTGATCCGACAAAGATAGTTCGAGCGATAGAGAAGTGAATCAAG
PABL001      GCTAAAGGTATCAAGGGCAGCGAACTGCGGACTTGCATGTTGATGGACTCGGTTCCATTGATGTGTATACGCCGAAGAGTCTTGATCCGACAAAGATAGTTCGAGCGATAGAGAAGTGAATCAAG
clustal      *****

17681 ----- CdiA1 class V -----
PABL012      CCGCGGACTCTTGGTGCAGGCGGACTTGCCAAGCACTGACATCTCGTCCATTGCTGCTCGTATGTGGGGGAAGACTAACCGCGCAGAGTATAAAAACATATATTTTCCAGAAACAGACGGATCATTGGT
PABL001      CCGCGGAGTCTTGGTGCAGGCGGACTTGCCAAGCACTGACATCTCGTCCATTGCTGCTCGTATGTGGGGGAAGACTAACCGCGCAGAGTATAAAAACATATATTTTCCAGAAACAGACGGATCATTGGT
clustal      *****

17811 ----- CdiI -----
PABL012      CCGATTTGATCGACCTGCTGGAGGAGGCTGATTTATGCCGAAGTACACGTGTACCTGTGGCTACGTTATGAACCTTTCGCAAGGATGGTCAGACTATGAGTTGACTCTAATTCCTGAGTCAGCAATAGAGA
PABL001      CCGATTTGATCGACCTGCTGGAGGAGGCTGATTTATGCCGAAGTACACGTGTACCTGTGGCTACGTTATGAACCTTTCGCAAGGATGGTCAGACTATGAGTTGACTCTAATTCCTGAGTCAGCAATAGAGA
clustal      *****

17941 ----- CdiI -----
PABL012      GCTTGGGGATAGGCTAGATAGCGAGGATAAGCTGTCTTCTGATCAGTTATATGAAGCTCTTGATGAAAAGGCCATTACGGTGTACCGATGCCCGAAGTGTAGAAGTTGCACCTGGAGGAAAGGCCAAA
PABL001      GCTTGGGGATAGGCTAGATAGCGAGGATAAGCTGTCTTCTGATCAGTTATATGAAGCTCTTGATGAAAAGGCCATTACGGTGTACCGATGCCCGAAGTGTAGAAGTTGCACCTGGAGGAAAGGCCAAA
clustal      *****

18071 ----- | -----
PABL012      TAGATTCACCACTTATATAGTTGAGTAA
PABL001      TAGATTCACCACTTATATAGTTGAGTAA
clustal      *****

```

**Figure S4.** Alignment between class II and class V *cdiA1* homologs. Nucleic acid sequence for the Class II *cdiA1* gene and downstream intergenic region from PABL012 and the Class V *cdiA1* gene alone from PABL001 were aligned to highlight the integration of a Class II C-terminus. The conserved sequence between the Class II and Class V *cdiA* genes is labeled above the alignment as “CdiA1”. The respective C-termini are then labeled as “CdiA1 class II” or “CdiA1 class V” as well as the downstream *cdiI* immunity genes. “\*” indicate identical residues, “:” are highly similar residues and “.” are weakly similar residues in the Gonnet PAM 250 matrix.



**Table S1.** *P. aeruginosa* NCBI reference genomes

| Strain      | Accession <sup>a</sup> | Strain     | Accession <sup>a</sup> | Strain       | Accession <sup>a</sup> |
|-------------|------------------------|------------|------------------------|--------------|------------------------|
| 8380        | SAMD00027370           | M37351     | SAMN02894351           | Pa84         | SAMN05020322           |
| 12939       | SAMN07831757           | MTB-1      | SAMN02389526           | PAER4-119    | SAMN04209275           |
| 12_4_4      | SAMN04351367           | N17-1      | SAMN03145716           | PAK          | SAMN02596970           |
| AR-0095     | SAMN04014936           | NCGM-1900  | SAMD00018700           | PAO1         | SAMN02603714           |
| AR-0354     | SAMN07291497           | NCGM-1984  | SAMD00019082           | PAO1-Orsay   | SAMEA3485223           |
| AR-0357     | SAMN07291500           | NCGM2.S1   | SAMD00061003           | PASGNDM345   | SAMN06689794           |
| AR-0360     | SAMN07291503           | NCGM257    | SAMD00020552           | PASGNDM699   | SAMN06689795           |
| ATCC-15692  | SAMN05715193           | NCTC10332  | SAMEA2479570           | PB350        | SAMN08101543           |
| ATCC-27853  | SAMN04589231           | NHmuc      | SAMN03940420           | PB353        | SAMN08101545           |
| BAMCPA07-48 | SAMN04893615           | Ocean-1155 | SAMN07347483           | PB354        | SAMN08101544           |
| BL22        | SAMN02360735           | Ocean-1175 | SAMN07347485           | PB367        | SAMN08101542           |
| C-NN2       | SAMEA104083446         | PA-150577  | SAMN04452273           | PB368        | SAMN08101546           |
| Carb01-63   | SAMN03389320           | PA-154197  | SAMN04452263           | PB369        | SAMN08101547           |
| DK1         | SAMEA3484633           | PA-D1      | SAMN04910034           | PcylI-10     | SAMEA26686918          |
| DK2         | SAMN02603895           | PA-D16     | SAMN04914381           | RIVM-EMC2982 | SAMN05583819           |
| DN1         | SAMN05717682           | PA-D2      | SAMN04910045           | RP73         | SAMN02603771           |
| E6130952    | SAMN06349407           | PA-D21     | SAMN04914386           | RW109        | SAMEA104432335         |
| F22031      | SAMN02673269           | PA-D22     | SAMN04914475           | S86968       | SAMN02894350           |
| F23197      | SAMN02894358           | PA-D25     | SAMN04914479           | SCV20265     | SAMN02415141           |
| F30658      | SAMN02894357           | PA-D5      | SAMN04910061           | SCVFeb       | SAMN03940423           |
| F5677       | SAMN02887043           | PA-D9      | SAMN04910066           | SCVJan       | SAMN03940421           |
| F63912      | SAMN02894356           | PA1        | SAMN02603191           | SJTD-1       | SAMN02894349           |
| F9670       | SAMN02894359           | PA1088     | SAMN04455104           | T38079       | SAMN02894348           |
| F9676       | SAMN03852256           | PA11803    | SAMN04455162           | T52373       | SAMN02894348           |
| FA-HZ1      | SAMN05729608           | Pa1207     | SAMN05020325           | T63266       | SAMN02894347           |
| FRD1        | SAMN02732380           | PA121617   | SAMN05006707           | UCBPP-PA14   | SAMN02603591           |
| H27930      | SAMN02894354           | PA124      | SAMN05020323           | USDA-41639   | SAMN04158502           |
| H47921      | SAMN02894353           | Pa1242     | SAMN05020326           | VA-134       | SAMN04284690           |
| ID4365      | SAMN02732281           | PA127      | SAMN05020324           | W16407       | SAMN02894346           |
| IOMTU133    | SAMD00042491           | PA14Or     | SAMEA4393802           | W36662       | SAMN02894344           |
| L10         | SAMN06234157           | PA1RG      | SAMN04074798           | W45909       | SAMN02894345           |
| LES431      | SAMN02641592           | Pa58       | SAMN05020321           | W60856       | SAMN02894343           |
| LESB58      | SAMEA1705916           | PA7        | SAMN02603435           | X78812       | SAMN02894342           |
| M1608       | SAMN02894352           | PA7790     | SAMN04455155           | YL84         | SAMN02641599           |
| M18         | SAMN02603849           | PA8281     | SAMN04455156           |              |                        |

<sup>a</sup> <https://www.ncbi.nlm.nih.gov/biosample/>

**Table S2. *P. aeruginosa* PABL CDI sequences**

| Strain  | CDI  | Accession <sup>a</sup> |
|---------|------|------------------------|---------|------|------------------------|---------|------|------------------------|---------|------|------------------------|
| PABL001 | CDI1 | MK509178               | PABL030 | CDI1 | MK509223               | PABL057 | CDI1 | MK509267               | PABL083 | CDI1 | MK509312               |
| PABL001 | CDI2 | MK509179               | PABL030 | CDI2 | MK509224               | PABL058 | CDI1 | MK509268               | PABL083 | CDI2 | MK509313               |
| PABL002 | CDI1 | MK509180               | PABL031 | CDI1 | MK509225               | PABL058 | CDI2 | MK509269               | PABL084 | CDI1 | MK509314               |
| PABL002 | CDI2 | MK509181               | PABL031 | CDI2 | MK509226               | PABL059 | CDI1 | MK509270               | PABL084 | CDI2 | MK509315               |
| PABL003 | CDI1 | MK509182               | PABL032 | CDI1 | MK509227               | PABL059 | CDI2 | MK509271               | PABL085 | CDI1 | MK509316               |
| PABL003 | CDI2 | MK509183               | PABL032 | CDI2 | MK509228               | PABL060 | CDI1 | MK509272               | PABL085 | CDI2 | MK509317               |
| PABL004 | CDI1 | MK509184               | PABL034 | CDI1 | MK509229               | PABL060 | CDI2 | MK509273               | PABL086 | CDI1 | MK509318               |
| PABL004 | CDI2 | MK509185               | PABL034 | CDI2 | MK509230               | PABL061 | CDI1 | MK509274               | PABL086 | CDI2 | MK509319               |
| PABL006 | CDI1 | MK509186               | PABL035 | CDI1 | MK509231               | PABL062 | CDI1 | MK509275               | PABL088 | CDI1 | MK509320               |
| PABL006 | CDI2 | MK509187               | PABL035 | CDI2 | MK509232               | PABL062 | CDI2 | MK509276               | PABL088 | CDI2 | MK509321               |
| PABL007 | CDI1 | MK509188               | PABL036 | CDI1 | MK509233               | PABL063 | CDI1 | MK509277               | PABL089 | CDI1 | MK509322               |
| PABL007 | CDI2 | MK509189               | PABL036 | CDI2 | MK509234               | PABL063 | CDI2 | MK509278               | PABL089 | CDI2 | MK509323               |
| PABL009 | CDI1 | MK509190               | PABL037 | CDI1 | MK509235               | PABL064 | CDI2 | MK509279               | PABL090 | CDI1 | MK509324               |
| PABL010 | CDI1 | MK509191               | PABL037 | CDI2 | MK509236               | PABL064 | CDI1 | MK509280               | PABL091 | CDI1 | MK509325               |
| PABL010 | CDI2 | MK509192               | PABL038 | CDI1 | MK509237               | PABL065 | CDI1 | MK509281               | PABL091 | CDI2 | MK509326               |
| PABL011 | CDI1 | MK509193               | PABL038 | CDI2 | MK509238               | PABL065 | CDI2 | MK509282               | PABL092 | CDI1 | MK509327               |
| PABL012 | CDI1 | MK509194               | PABL040 | CDI1 | MK509239               | PABL066 | CDI1 | MK509283               | PABL092 | CDI2 | MK509328               |
| PABL012 | CDI2 | MK509195               | PABL040 | CDI2 | MK509240               | PABL066 | CDI2 | MK509284               | PABL093 | CDI1 | MK509329               |
| PABL013 | CDI1 | MK509196               | PABL041 | CDI1 | MK509241               | PABL067 | CDI1 | MK509285               | PABL093 | CDI2 | MK509330               |
| PABL014 | CDI1 | MK509197               | PABL041 | CDI2 | MK509242               | PABL067 | CDI2 | MK509286               | PABL094 | CDI1 | MK509331               |
| PABL015 | CDI1 | MK509198               | PABL042 | CDI1 | MK509243               | PABL068 | CDI1 | MK509287               | PABL094 | CDI2 | MK509332               |
| PABL016 | CDI1 | MK509199               | PABL042 | CDI2 | MK509244               | PABL068 | CDI2 | MK509288               | PABL095 | CDI1 | MK509333               |
| PABL016 | CDI2 | MK509200               | PABL044 | CDI1 | MK509245               | PABL069 | CDI1 | MK509289               | PABL095 | CDI2 | MK509334               |
| PABL017 | CDI1 | MK509201               | PABL044 | CDI2 | MK509246               | PABL069 | CDI2 | MK509290               | PABL096 | CDI1 | MK509335               |
| PABL018 | CDI1 | MK509202               | PABL045 | CDI1 | MK509247               | PABL070 | CDI1 | MK509291               | PABL097 | CDI1 | MK509336               |
| PABL018 | CDI2 | MK509203               | PABL045 | CDI2 | MK509248               | PABL070 | CDI2 | MK509292               | PABL097 | CDI2 | MK509337               |
| PABL019 | CDI1 | MK509204               | PABL046 | CDI1 | MK509249               | PABL071 | CDI1 | MK509293               | PABL098 | CDI1 | MK509338               |
| PABL019 | CDI2 | MK509205               | PABL047 | CDI1 | MK509250               | PABL071 | CDI2 | MK509294               | PABL100 | CDI1 | MK509339               |
| PABL020 | CDI1 | MK509206               | PABL047 | CDI2 | MK509251               | PABL072 | CDI1 | MK509295               | PABL100 | CDI2 | MK509340               |
| PABL020 | CDI2 | MK509207               | PABL048 | CDI1 | MK509252               | PABL072 | CDI2 | MK509296               | PABL101 | CDI1 | MK509341               |
| PABL021 | CDI1 | MK509208               | PABL048 | CDI2 | MK509253               | PABL073 | CDI1 | MK509297               | PABL101 | CDI2 | MK509342               |
| PABL021 | CDI2 | MK509209               | PABL049 | CDI1 | MK509254               | PABL074 | CDI1 | MK509298               | PABL102 | CDI1 | MK509343               |
| PABL022 | CDI1 | MK509210               | PABL049 | CDI2 | MK509255               | PABL074 | CDI2 | MK509299               | PABL103 | CDI1 | MK509344               |
| PABL022 | CDI2 | MK509211               | PABL051 | CDI1 | MK509256               | PABL075 | CDI1 | MK509300               | PABL103 | CDI2 | MK509345               |
| PABL023 | CDI1 | MK509212               | PABL052 | CDI1 | MK509257               | PABL075 | CDI2 | MK509301               | PABL104 | CDI1 | MK509346               |
| PABL023 | CDI2 | MK509213               | PABL052 | CDI2 | MK509258               | PABL076 | CDI1 | MK509302               | PABL104 | CDI2 | MK509347               |
| PABL024 | CDI1 | MK509214               | PABL053 | CDI1 | MK509259               | PABL076 | CDI2 | MK509303               | PABL105 | CDI1 | MK509348               |
| PABL024 | CDI2 | MK509215               | PABL053 | CDI2 | MK509260               | PABL077 | CDI1 | MK509304               | PABL106 | CDI1 | MK509349               |
| PABL026 | CDI1 | MK509216               | PABL054 | CDI1 | MK509261               | PABL078 | CDI1 | MK509305               | PABL106 | CDI2 | MK509350               |
| PABL027 | CDI1 | MK509217               | PABL054 | CDI2 | MK509262               | PABL079 | CDI1 | MK509306               | PABL107 | CDI1 | MK509351               |
| PABL027 | CDI2 | MK509218               | PABL055 | CDI1 | MK509263               | PABL079 | CDI2 | MK509307               | PABL107 | CDI2 | MK509352               |
| PABL028 | CDI1 | MK509219               | PABL055 | CDI2 | MK509264               | PABL080 | CDI1 | MK509308               | PABL108 | CDI1 | MK509353               |
| PABL028 | CDI2 | MK509220               | PABL056 | CDI1 | MK509265               | PABL081 | CDI1 | MK509309               | PABL108 | CDI2 | MK509354               |
| PABL029 | CDI1 | MK509221               | PABL056 | CDI2 | MK509266               | PABL082 | CDI1 | MK509310               |         |      |                        |
| PABL029 | CDI2 | MK509222               | PABL057 | CDI1 | MK509267               | PABL082 | CDI2 | MK509311               |         |      |                        |

<sup>a</sup> <https://www.ncbi.nlm.nih.gov/genbank/>

**Table S3. *P. aeruginosa* CdiA C-terminal amino acid sequence diversity.**

| TD   | CT   | TD + CT Sequence                                                                                                                                                                                                                                                                                                                                                                                                                                                                                                                                             | Domain Family | Enzymatic Activity | CdiI   | Sequence                                                                                                                                                                                    |
|------|------|--------------------------------------------------------------------------------------------------------------------------------------------------------------------------------------------------------------------------------------------------------------------------------------------------------------------------------------------------------------------------------------------------------------------------------------------------------------------------------------------------------------------------------------------------------------|---------------|--------------------|--------|---------------------------------------------------------------------------------------------------------------------------------------------------------------------------------------------|
| TD01 | CT01 | TENNYLGTGNVLFHGHQLGNSQVDAFHKELKASCSSGGTQACLNTYSKWKETS<br>YKGGLESKNQAGWEDFVRAAYAEIVLPLCKGNSVCLDNVNAKMSADMVYAGVAD<br>GLKDSVGTARGVNIANGNVVTRTGLQVVEAGLLAAIGGVFGVGSSTAAKATVNA<br>EGAAALPAGYREGSSAGSAFLTAQTEPEGYRRVINTKGNTEVLAADGKLYFETGN<br>GLQPKAGGNLSGLVFAEAKSIALRQOASKITAPIDPDGHIIRAIEVPPNGNVVGGHS<br>TVTGDVVRVIPGTEVSNPAQGVYSAKLEVADPAMPFGSYLPTKNNNGVSTMPFKSWT<br>ADRIKVEVDAAFQNRVTVGNKWNMTTPSGVREGEVGLSPKTTVYVKL                                                                                                                                            | pfam14436     | Nuclease           | CdiI01 | MKIRYFWTGEGENEPCQSDVLSDDGIDLLACL<br>FVDHGGQKYESSIAWLDEGLSRVNIIRGAGIECS<br>DWSRDSWGLERLNGMARIYSLYDEDCSAAIALDD<br>FERALLGWKRFIQAD                                                             |
| TD02 | CT02 | TENNFLGGGTPPGLISYQQAASSLTFYMRKNGATAEETQQRDLAQQGQFDGQV<br>PANEFIKAWGEAMVAEAAAGLIVAGLGRFLGWKAGETAIAVPRVQRSRINIA<br>NGRTATPLRDTGRPVSAAGFDHVLQGHFGEVNSRSRVSFTITPSELKDLVQSSPV<br>VKSPPMALPDGQFVRTVDVGVKVIETNLKDGGVPTSVLKIITDRAGNLITTFPIK<br>AVD                                                                                                                                                                                                                                                                                                                   | unknown       | unknown            | CdiI02 | LSYLP IRVWTFDQSAVRLLSAEASPKVLDLILN<br>WIKRNRKFFLSSGSAVYVGFEEFLGSGEEMPVNF<br>SNFSSSELENFKKFTFYKQAKVDVYIAQFLRVDVI<br>ETLITVEVDKPCNCNSEGMHVF IGKYNLNVAYQ<br>CNVCGHSQYSDGSKVEVGGLEFITERKLRDLKLI |
| TD02 | CT03 | TENNFLGGGTPPGLISYQQAASSLTFYMRKNGATAEETQQRDLAQQGQFDGQV<br>PANEFIKAWGEAMVAEAAAGLIVAGLGRFLGWKAGETAIAVPRVQRSRINIA<br>NGRTATPLRDTGRPVSAAGFDHVLQGHFGEVNSRSRVSFTITPSELKDLVQSSPV<br>VKSPPMALPDGQFVRTVDVGVKVIETNLKDGGVPTSVLKIITDRAGNLITTFPIK<br>AVD                                                                                                                                                                                                                                                                                                                   | pfam14437     | Deaminase          | CdiI03 | MIVLGGYLIAPAEAKRTQFPVVSDDPEEVEVLAALS<br>KLRHSSGVLRVVKPEPEIGAYEVALHAESGRFI<br>VMLSQHAEDGEHEVTLRAGAGEGNGFTYILGEAY<br>PMAAVTENFGLICNCFKFLLEREVSDDVWV                                           |
| TD04 | CT04 | NEALVSLVGEKIFPGEAHERVLAAMTSQILGIMTVAAAGGDTKAQEAAWVAQQAT<br>VYNNLNHAAEESLLEIKDCRAAGCGEELQGLGKYEKLSAERSNAIGQCSAR<br>QCVDVIDVSSIRMDDPVSKELLSLRQRTYDTPGLLQGNPDVAIVSQTPNPSGWDD<br>LFALDKQLAFKLNKEGWLPEETADLLDRWNASTSWLDRTAGRQLDPEKAYLLS<br>ELGGAAMALLGGRSVGSAGGIRNTYSSIKEAPKYPQGFKDIKNGTQYKINN<br>QDVLBSLRGVEPKVWVYRDGDSAGNKISVHYFQSQSGKVFDDVVKVSGWSN                                                                                                                                                                                                             | unknown       | unknown            | CdiI04 | MRLCYEIEASQAEGFLSIFILGLVWLSLKKGVINI<br>EDAEGFIFPKPATSXVYVGFEEFLGSGEEMPVNF<br>LEDVLSLVPKLDENIDTLIERVSYIVSAKTDRG<br>GLIDKNIFLVNEGEE                                                           |
| TD04 | CT05 | NEALVSLVGEKIFPGEAHERVLAAMTSQILGIMTVAAAGGDTKAQEAAWVAQQAT<br>VYNNLNHAAEESLLEIKDCRAAGCGEELQGLGKYEKLSAERSNAIGQCSAR<br>QCVDVIDVSSIRMDDPVSKELLSLRQRTYDTPGLLQGNPDVAIVSQTPNPSGWDD<br>LFALDKQLAFKLNKEGWLPEETADLLDRWNASTSWLDRTAGRQLDPEKAYLLS<br>ELGGAAMALLGGRSVGSAGGIRNTYSSIKEAPKYPQGFKDIKNGTQYKINN<br>QDVLBSLRGVEPKVWVYRDGDSAGNKISVHYFQSQSGKVFDDVVKVSGWSN                                                                                                                                                                                                             | unknown       | unknown            | CdiI05 | MKELFEVIFEGVNTSRLFFLLKEIESKSDRIFDF<br>NFSDEFFSSNVNVSSELLIDSLFGLNGDLYFVGS<br>MEGFSVKDGLKLPVLLRVLKVEGGVDVGLCFYM<br>NDFNSAGVLMLEFQYMMNIGSADFGFENFYGGLE<br>PASDQETRFPTNRLGLPLL                  |
| TD05 | CT06 | NEALVAKLDQAFKLSLSPENREAMVTMGSQVGLVAAAVRDPDVTGKALESAAWVA<br>KNSTQYNFLNHQDVAADLNLQKCKSQGNCRQVEEFAKRSDENRRRLNGCVAAG<br>NCAEIRAEI DAGSTALNELVARQETANPGGSDSDIAYGFLMGRNVVDWTTAGQLH<br>LEQTANLWNGNPQWQKEVAGYLDQTFGNPFGI GVPAMGGAAGKVSAKALMNALK<br>AGELPKGEVAPGKANLPTI GALADAEAGMPYTHPVKLAATATGAKI KEAGAI I<br>PDANEVRAQGSLGSLGVDYTHQTASAKIQQQRTADLHVDGLGSDIVYTPKNLD<br>PTKIVRAIEKSSNQAGGVLVQADLPSTDMSSIAARMWGTNAQSIKTIFFPKPDG<br>SLVRFDRPAGGG                                                                                                                       | cdl3442       | tRNase             | CdiI06 | MPKYTCCTCYVMNLSQGWSDYELTILPESAIESL<br>DRLDSEDKLSSDQYEALEDEKAITVYRCPKCR<br>LHLEEBENRPTTYIVE                                                                                                  |
| TD05 | CT07 | NEALVAKLDQAFKLSLSPENREAMVTMGSQVGLVAAAVRDPDVTGKALESAAWVA<br>KNSTQYNFLNHQDVAADLNLQKCKSQGNCRQVEEFAKRSDENRRRLNGCVAAG<br>NCAEIRAEI DAGSTALNELVARQETANPGGSDSDIAYGFLMGRNVVDWTTAGQLH<br>LEQTANLWNGNPQWQKEVAGYLDQTFGNPFGI GVPAMGGAAGKVSAKALMNALK<br>AGELPKGEVAPGKANLPTI GALADAEAGMPYTHPVKLAATATGAKI KEAGAI I<br>PDANEVRAQGSLGSLGVDYTHQTASAKIQQQRTADLHVDGLGSDIVYTPKNLD<br>PTKIVRAIEKSSNQAGGVLVQADLPSTDMSSIAARMWGTNAQSIKTIFFPKPDG<br>SLVRFDRPAGGG                                                                                                                       | unknown       | unknown            | CdiI07 | MKVNLIFEKVDGINSYDYPYLCVYREGEREPEMFI<br>SVSKERKIEFPVYRSTDMFTLSSEEFYIEYGRAE<br>AFLPQALENEDSL                                                                                                  |
| TD05 | CT08 | NEALVAKLDQAFKLSLSPENREAMVTMGSQVGLVAAAVRDPDVTGKALESAAWVA<br>KNSTQYNFLNHQDVAADLNLQKCKSQGNCRQVEEFAKRSDENRRRLNGCVAAG<br>NCAEIRAEI DAGSTALNELVARQETANPGGSDSDIAYGFLMGRNVVDWTTAGQLH<br>LEQTANLWNGNPQWQKEVAGYLDQTFGNPFGI GVPAMGGAAGKVSAKALMNALK<br>AGELPKGEVAPGKANLPTI GALADAEAGMPYTHPVKLAATATGAKI KEAGAI I<br>PDANEVRAQGSLGSLGVDYTHQTASAKIQQQRTADLHVDGLGSDIVYTPKNLD<br>PTKIVRAIEKSSNQAGGVLVQADLPSTDMSSIAARMWGTNAQSIKTIFFPKPDG<br>SLVRFDRPAGGG                                                                                                                       | pfam15529     | RNase              | CdiI08 | MKIVSFKDLKCLSNYELWRSGWENKNEIDVFSY<br>ISYERIPDILLGLKLVFPEFLDRGAVILEMNY<br>EKKFNDRMERLENDIQSVERFINHTHYIDFSG<br>CNDEVEDIEFQLAHMLSLSWRLILKEKFPDRDF<br>SVLLSCSDQDYGPTITTFYQK                     |
| TD06 | CT09 | NEALVKDLKLVSSYSPENREAMLAMASQTLGLVGVVAKDPGASYKELETGSWAA<br>RNSVQYNLNEHENQERFEAKKACNGGDSACGRVDELNQLDRNRDLALLTACSS<br>GGSTTCTALRKEAEWASQSLKQASWTFEAEQYRQAMQNPQLMAYTIEGELRSI<br>YQINDPITAAADSKRLAEAMASLGSDFIPGYDGAKFVBAQDPDFYTMAGLGLVPG<br>IGDGAAILAKAKALYKEGVSEAADLVEGLGKLPAPQAGKGTGTVEGAVGTGAR<br>NPLDDAIPRNGDRLVVSQGAAPTCHGNSCGMVLNLTGKEVDVGVLVQKVKPSAG<br>GIYAQDADLMKSEGI PASAFGNRNVADLTRYTSNGTTPVVRIDAKTGDSDFSHF<br>VVVDGVTTRNGVSVVAIRDPHGTQYFSPVATFEKSFTEGVVVPKAL                                                                                          | pfam03412     | Peptidase          | CdiI09 | MKLRIEFPKDIRTYGLLQERIPCLCKVSKFEFI<br>SFDSTIPESGVVLEWNRKELERAIAGGGRTY<br>HYGNGLITLKDVGADTYQI IDLEIFYARFGWCVV<br>LKDGEYAPPGDFWDEE                                                             |
| TD06 | CT10 | NEALVKDLKLVSSYSPENREAMLAMASQTLGLVGVVAKDPGASYKELETGSWAA<br>RNSVQYNLNEHENQERFEAKKACNGGDSACGRVDELNQLDRNRDLALLTACSS<br>GGSTTCTALRKEAEWASQSLKQASWTFEAEQYRQAMQNPQLMAYTIEGELRSI<br>YQINDPITAAADSKRLAEAMASLGSDFIPGYDGAKFVBAQDPDFYTMAGLGLVPG<br>IGDGAAILAKAKALYKEGVSEAADLVEGLGKLPAPQAGKGTGTVEGAVGTGAR<br>NPLDDAIPRNGDRLVVSQGAAPTCHGNSCGMVLNLTGKEVDVGVLVQKVKPSAG<br>GIYAQDADLMKSEGI PASAFGNRNVADLTRYTSNGTTPVVRIDAKTGDSDFSHF<br>VVVDGVTTRNGVSVVAIRDPHGTQYFSPVATFEKSFTEGVVVPKAL                                                                                          | pfam13930     | Nuclease           | CdiI10 | MGDQELYKIQGLLVADAGPADAREI I VRAELFSE<br>GDGRYFEDYVDQSGELNWFDPDGRAVGLTELL<br>VQLRKYFSAANLTAGEGGWGCVIKLVHDEMKFG<br>IAFNYGK                                                                    |
| TD06 | CT11 | NEALVKDLKLVSSYSPENREAMLAMASQTLGLVGVVAKDPGASYKELETGSWAA<br>RNSVQYNLNEHENQERFEAKKACNGGDSACGRVDELNQLDRNRDLALLTACSS<br>GGSTTCTALRKEAEWASQSLKQASWTFEAEQYRQAMQNPQLMAYTIEGELRSI<br>YQINDPITAAADSKRLAEAMASLGSDFIPGYDGAKFVBAQDPDFYTMAGLGLVPG<br>IGDGAAILAKAKALYKEGVSEAADLVEGLGKLPAPQAGKGTGTVEGAVGTGAR<br>NPLDDAIPRNGDRLVVSQGAAPTCHGNSCGMVLNLTGKEVDVGVLVQKVKPSAG<br>GIYAQDADLMKSEGI PASAFGNRNVADLTRYTSNGTTPVVRIDAKTGDSDFSHF<br>VVVDGVTTRNGVSVVAIRDPHGTQYFSPVATFEKSFTEGVVVPKAL                                                                                          | pfam1429      | tRNase             | CdiI11 | MIVVSEAFKSWLIGCIGLRLVWGLFHFVESK<br>NGNPQAVALLFDGKDFGLKCAPDSSIAYSDDV<br>VABCDLGEFGAEKIPPLESDEAFSSVVGALNSV<br>SLLSVSEDSVAGVLLRFVNSSECLSFINLGDLEF<br>VYKEIPSEIKCEGLEFLKLS                      |
| TD07 | CT12 | NEAMINLLGKMGVGGDQNLLEMASQVGVAAASVNGDVSLGAEIAKSGTAYNRQL<br>HPDEIKFASDVKRVRYAENGLSEDTARKEKLLSTAAMVNDWNGVQALAGTDINA<br>ARAAYQLRTELGTGPDNSLQVQTADYNERVGLTALFKNKEALTSVLENI ALAN<br>PASVTRDPANRAEVLNAKGEQSGAGFLALEGIVSAPSKTALWLMGALTCSSCAE<br>RDIQNAWNSVASLPEDIRMGYLDALHTMQGQAGSVVRDAAASSTALGVEVGLAI<br>DGGLAGAGKGVVTDGPKGILTLKDFPDVSTKISQQLRHAGTQQLEARGGGGFL<br>NSVSDAQKLVDAHYTGQVILGRNAQGFVVKPEFVGTNTVNLVGVITDQATNVP<br>IIKGTKSPSIVPTNPNWSPK                                                                                                                     | pfam15542     | tRNase             | CdiI12 | MSSQPTLEENWFQVLMQIALVGAISANFRMIAL<br>LWDGDEWLRFLYEESENEEDVEEIEDVVCQYTA<br>QSSLRCSRSELIVRERLPLGLSEVRVYRRRES<br>FDI                                                                           |
| TD07 | CT13 | NEAMINLLGKMGVGGDQNLLEMASQVGVAAASVNGDVSLGAEIAKSGTAYNRQL<br>HPDEIKFASDVKRVRYAENGLSEDTARKEKLLSTAAMVNDWNGVQALAGTDINA<br>ARAAYQLRTELGTGPDNSLQVQTADYNERVGLTALFKNKEALTSVLENI ALAN<br>PASVTRDPANRAEVLNAKGEQSGAGFLALEGIVSAPSKTALWLMGALTCSSCAE<br>RDIQNAWNSVASLPEDIRMGYLDALHTMQGQAGSVVRDAAASSTALGVEVGLAI<br>DGGLAGAGKGVVTDGAGKSAAGAAEANNLSAEGVVASRVNRVTRGAANVTGSGL<br>EYAWKHHGAWGDNKSAFTISKNELKVVLSQPVVKTAYQSPSTSGNFIRTVDMG<br>RPIGIDAKAGQPTNFMTVITDSKGNLVNTPKGF                                                                                                       | unknown       | unknown            | CdiI13 | MYLMIWDRYLASIGRDCLDKVEIPLDVANFF<br>RLDVEQYILSSLSFDDYDFMFGAIDSLVGLC<br>SVASINPLISETVESMVDIMLKARALGNILFDP<br>FKVD                                                                             |
| TD08 | CT14 | NEALVNLVSNMAGGEEKLEMASQTLGLLAATVVDGVAKGAETAKNATAYNQQA<br>HRDLSRLKRGMSALHEQGYADLEPETVLADLQKIASGEAKSVSDLPKVVQFL<br>NSEFSPASLRETLFEPESWEYAAIADVLYPTPGKAAAIKAGGKLSKEALEA<br>LEKFPSSDALKNALWTSKSKSAIENAFGHQKXKGFPEFKNAQYVVEGTQNFL<br>SSPPGTLTKTRFNGDITLLDPKNTTFGVKDANGAPRTMFRPQDGINVWNRQ<br>NEALVNLVSNMAGGEEKLEMASQTLGLLAATVVDGVAKGAETAKNATAYNQQA<br>HRDLSRLKRGMSALHEQGYADLEPETVLADLQKIASGEAKSVSDLPKVVQFL<br>NSEFSPASLRETLFEPESWEYAAIADVLYPTPGKAAAIKAGGKLSKEALEA<br>LEKFPSESTKQELSKLLQEDPRNLIPQTAKEMSGSIKRIKVSIKENGFQDEK<br>PVDVWRNPKTGRLEIQDGHRTAACKAGLDKIPVSIWE | unknown       | unknown            | CdiI14 | MRYPCPCGYLTFDEEPCGYEICPVYEWEDDIA<br>QNKDPDYGANGI SLNNAKENFFRYGAIKREFL<br>KNVRKPLDESL                                                                                                        |
| TD08 | CT15 | NEALVNLVSNMAGGEEKLEMASQTLGLLAATVVDGVAKGAETAKNATAYNQQA<br>HRDLSRLKRGMSALHEQGYADLEPETVLADLQKIASGEAKSVSDLPKVVQFL<br>NSEFSPASLRETLFEPESWEYAAIADVLYPTPGKAAAIKAGGKLSKEALEA<br>LEKFPSESTKQELSKLLQEDPRNLIPQTAKEMSGSIKRIKVSIKENGFQDEK<br>PVDVWRNPKTGRLEIQDGHRTAACKAGLDKIPVSIWE                                                                                                                                                                                                                                                                                        | smart00470    | ParB-like Nuclease | CdiI15 | VARYSVAFALPIGTDVVSFSDGWEFKSPAPLSLN<br>VKSEFISKFNLELVECYSGVEKFSVDGLEFLVY<br>NDLHAIEIYFKYDKSFLVKEKFRWSDNDRDYC<br>YLFPPGE                                                                      |

|      |      |                                                                                                                                                                                                                                                                                                                                                                                                                                                                                        |           |                        |        |                                                                                                                                                                                                                      |
|------|------|----------------------------------------------------------------------------------------------------------------------------------------------------------------------------------------------------------------------------------------------------------------------------------------------------------------------------------------------------------------------------------------------------------------------------------------------------------------------------------------|-----------|------------------------|--------|----------------------------------------------------------------------------------------------------------------------------------------------------------------------------------------------------------------------|
| TD04 | CT16 | NEALVSLVGEKIFPGEAHERVLAMTSQLIGMTVAAAAGGDTKAQEKAAWVAQQAT<br>VYNNLNHAAEESLLKEIKDCRAAGCGCEELKQIGLKYKESLAEBSNAIGCASR<br>QCVDVIVDSSIRMDPPVSKELLSLRQTTTYDTPGLLQGNPDVAVVSQTPNPSGWGD<br>LFLADKQLAFKLNKKEGWLTPPEETADLLDRWNASTSWLDRTAGRQLDDPKAYLLS<br>ELGGAAAMALLGGRRSVGAGAGKSLPTNATIASNGLVYKSNPKHTLGGQGNRP<br>NAGIEPQDLSRLRFQSIASSKQYQNKVEFRFAVDSRDIHRFEGANGEFHWNGSSG<br>DLRNLPLVGSQIPNDIQKLGVRVK                                                                                               | unknown   | unknown                | CdiI16 | MIVGDFFYFALQFDVVDVSDWNSPGDSWRNGIFLYL<br>VSGEKIFSVVDVLELETIFSFYKAPIEGLCVND<br>VQLNSADIKYKASEYFWGDGVEVVKGLFDLTATA<br>MSDNGCFLYFIKTSTIGDRLVWSVDDGACVKEVYL<br>EMDVVLNVIKKLRSCSL                                          |
| TD05 | CT17 | NEALVAKLDAQFKSLSPENREAMVTMGSQLVGLAAAVRDPDVTGKALESAAWVA<br>KNSQYFNLNHQVDADLDNALQCKSQGNCRQVEEFKARSDENRRRLNGCVAAG<br>NCAEIRAEIDAGSTALNELVARQETANPGGSDSDIAYGFLMGRNVVDWTAGQLH<br>LEQTANLWNGNPNQWKEVGAJLDOTGFNPFQIGVPMGGAAGKVSAKALMNAK<br>AGELPKGEVAPGKANLPTIGALADAEGAMPYTHPVKPKGAKGAVIPKGSNADFFA<br>RFGTDAREGLAKAGYGNVEPIQGSAITGQSFKTGAQFVGRVSDFDIALAGSEL<br>LQRAQSLGILGRSGGTRTGPLSRDLQALGLKDLARKLSAQAGREVNFMIDYSA<br>TAASRAPSLVLPK                                                         | unknown   | unknown                | CdiI17 | MIAVDLYGTKNLSFLAREHIEIKFVGLDERNS<br>SYQGDDYMLGSDNSENILKANLPLDDEPVEL<br>NFPDYPIILYINATRRSSAIEGVIKKACFKLLR<br>HEMF                                                                                                     |
| TD05 | CT18 | NEALVAKLDAQFKSLSPENREAMVTMGSQLVGLAAAVRDPDVTGKALESAAWVA<br>KNSQYFNLNHQVDADLDNALQCKSQGNCRQVEEFKARSDENRRRLNGCVAAG<br>NCAEIRAEIDAGSTALNELVARQETANPGGSDSDIAYGFLMGRNVVDWTAGQLH<br>LEQTANLWNGNPNQWKEVGAJLDOTGFNPFQIGVPMGGAAGKVSAKALMNAK<br>AGELPKGEVAPGKANLPTIGALADAEGAMPYTHPVKPKGAKGAVIPKGSNADFFA<br>RFGTDAREGLAKAGYGNVEPIQGSAITGQSFKTGAQFVGRVSDFDIALAGSEL<br>LQRAQSLGILGRSGGTRTGPLSRDLQALGLKDLARKLSAQAGREVNFMIDYSA<br>TAASRAPSLVLPK                                                         | unknown   | unknown                | CdiI18 | MNSCQHVLCGLVDFSKLPDNNVVKKGMTFFV<br>ERSALYLSLILKLLFFVSVNSAKKIFPFLVAQ<br>KNKFEISSVYEDLLEINFTEIENRLCALYEKHV<br>LVGEVGRIVAFSDMVSWWLYEEVEELGLVLMVD<br>ETKSVSNDFDFGEFVSREFMMEQADLGLYRKEYV<br>DKLISNY                       |
| TD07 | CT19 | NEAMINLLKRMVGGDQNLLEMASQLVGVAAASAVNGDVSLGAEIAKSGTAYNRQL<br>HPDEIKFASDVERKRYAENGLSEDARKEKLLSTAAMVDNGWQALAGTDINA<br>ARAAQYLRTELGTGPDNSLQVQTADYVNERVGLTALFKNKEALTSVLENIALAN<br>PASVTRDPANRAEVLNNAKGGSGAGFGLALEGIVSAPSKTALWLMGALTCSSCAE<br>RDIQANWNSVASLPEDIRMGYLDALHTMQGGQAGSVVDRNAASSTALGVEVGLAI<br>DGGLAGAGKGVVTDGAKTCEVASSGGPVEFLFGGQAQTPGAINVDVDPDIQS<br>GIRADATKLPFRDNLGVEVSNPFIKPSAGGTNSMMDFLPEATRVIPEGGKIFI<br>NANAANPYGKIPSAESELESGLRRIQNGPLDSRFSGQTFRLTRDGSVITNLDMSKT<br>IVLEKIK | pfam08241 | Methyl-<br>transferase | CdiI19 | MIFVDFDELDTFNCTYGFSEEKSGALRVFVEGGL<br>AFPYGMFLKEENGVRFFKCEKDNSENVEGIFPRH<br>YIYDPSRRVYEVWELSDHLLRARTKSGEWVQY<br>TSKADSQYAMHEFVGGCWFEVGAHFSKRIINEY<br>TDGREKSAKNVIEQFESRSCIDALSREYLLGV<br>LEVQPGPGLWMLYIYAKSFHIEIPDV  |
| TD07 | CT20 | NEAMINLLKRMVGGDQNLLEMASQLVGVAAASAVNGDVSLGAEIAKSGTAYNRQL<br>HPDEIKFASDVERKRYAENGLSEDARKEKLLSTAAMVDNGWQALAGTDINA<br>ARAAQYLRTELGTGPDNSLQVQTADYVNERVGLTALFKNKEALTSVLENIALAN<br>PASVTRDPANRAEVLNNAKGGSGAGFGLALEGIVSAPSKTALWLMGALTCSSCAE<br>RDIQANWNSVASLPEDIRMGYLDALHTMQGGQAGSVVDRNAASSTALGVEVGLAI<br>DGGLAGAGKGVVTDGAKTCEVASSGGPVEFLFGGQAQTPGAINVDVDPDIQS<br>GIRADATKLPFRDNLGVEVSNPFIKPSAGGTNSMMDFLPEATRVIPEGGKIFI<br>NANAANPYGKIPSAESELESGLRRIQNGPLDSRFSGQTFRLTRDGSVITNLDMSKT<br>IVLEKIK | unknown   | unknown                | CdiI20 | VKIRRSIEKRMKDELESGRGCYFEREEOGILFS<br>THLEGRLDIYINGFAVGEGRMKLLFSEVVR<br>VSHLIEIEMFSAGDQGLDLYVPLDVECELSNVT<br>LSVPFLAYSINIMILLGLREDWIKRDISDG                                                                           |
| TD09 | CT21 | NEALVNSLAKQYASLPIDDKKGLLIMSSQLIGVLAASTQGDADAKSLQTGAWVAG<br>NATQHNYLSHWQEEKKRQEVDCGCKDKQLCTGIEAKWAIISAQQDVGIVVGVGGG<br>IGLSTAETAAGVYVYELVKNWRETYAALEQLATSPEFRQQFGDNYLKGLEERAAPLT<br>QAYEDAGWQGSVTAAGVEGGRFAEELVGLVAVKGAQITAKLPTAANKLNVAIAE<br>SPVSGMSLQAGVLDLGRGGGKATAGKVADEFIPPMERPFPRVNPPEPP<br>GEGRLPYEASRAGVQAKLAVKTELENATAVSDIIPKSAVRGNVLDHVVSSTKN<br>STVSLRVLPGKGYEFTDILSEKSKF                                                                                                    | unknown   | unknown                | CdiI21 | MIIEKIFEFRRSFFMSGLVCKMLVFLFRFR<br>SGWVSLDIGEVLRILSFGSEPKLLGLDEISDDF<br>AYPIQSSNELDRYFKGLLAVYKYLISDVEDGCV<br>GVYDFGDCGFSVLESDNLSIIDGVVVRSDVA<br>LSKLEI                                                                |
| TD09 | CT22 | NEALVNSLAKQYASLPIDDKKGLLIMSSQLIGVLAASTQGDADAKSLQTGAWVAG<br>NATQHNYLSHWQEEKKRQEVDCGCKDKQLCTGIEAKWAIISAQQDVGIVVGVGGG<br>IGLSTAETAAGVYVYELVKNWRETYAALEQLATSPEFRQQFGDNYLKGLEERAAPLT<br>QAYEDAGWQGSVTAAGVEGGRFAEELVGLVAVKGAQITAKLPTAANKLNVAIAE<br>SPVSGMSLQAGVLDLGRGGGKATAGKVADEFIPPMERPFPRVNPPEPP<br>GEGRLPYEASRAGVQAKLAVKTELENATAVSDIIPKSAVRGNVLDHVVSSTKN<br>STVSLRVLPGKGYEFTDILSEKSKF                                                                                                    | unknown   | unknown                | CdiI22 | MMACLSWLEKLESFASTGLDYEDLYELIASIT<br>RKRTPFPAINEASGKGVGSEGGHFYSLDQDWD<br>DPEEFNEVSEFLGVEVTSIIPVLDVFLMKIAD<br>VYDFPEERDSVLSAKKLEERYSKRFPV                                                                              |
| TD09 | CT23 | NEALVNSLAKQYASLPIDDKKGLLIMSSQLIGVLAASTQGDADAKSLQTGAWVAG<br>NATQHNYLSHWQEEKKRQEVDCGCKDKQLCTGIEAKWAIISAQQDVGIVVGVGGG<br>IGLSTAETAAGVYVYELVKNWRETYAALEQLATSPEFRQQFGDNYLKGLEERAAPLT<br>QAYEDAGWQGSVTAAGVEGGRFAEELVGLVAVKGAQITAKLPTAANKLNVAIAE<br>SPVSGMSLQAGVLDLGRGGGKATAGKVADEFIPPMERPFPRVNPPEPP<br>GEGRLPYEASRAGVQAKLAVKTELENATAVSDIIPKSAVRGNVLDHVVSSTKN<br>STVSLRVLPGKGYEFTDILSEKSKF                                                                                                    | unknown   | unknown                | CdiI23 | MNTPEIKRESSSLELIEALGETEWRKCVNSQFI<br>NKEGEWIKDQSSHPRRVFRFIOEDPAIISR<br>RVAIESYQGRKVVLDLDEHKRVDLPTNNGWIVPSR<br>LLEVDLALRALDAPNQMAKYEPEFGSIAYEDI<br>IDLTEHIRRAFPEVTSKNSPL                                              |
| TD09 | CT24 | NEALVNSLAKQYASLPIDDKKGLLIMSSQLIGVLAASTQGDADAKSLQTGAWVAG<br>NATQHNYLSHWQEEKKRQEVDCGCKDKQLCTGIEAKWAIISAQQDVGIVVGVGGG<br>IGLSTAETAAGVYVYELVKNWRETYAALEQLATSPEFRQQFGDNYLKGLEERAAPLT<br>QAYEDAGWQGSVTAAGVEGGRFAEELVGLVAVKGAQITAKLPTAANKLNVAIAE<br>SPVSGMSLQAGVLDLGRGGGKATAGKVADEFIPPMERPFPRVNPPEPP<br>GEGRLPYEASRAGVQAKLAVKTELENATAVSDIIPKSAVRGNVLDHVVSSTKN<br>STVSLRVLPGKGYEFTDILSEKSKF                                                                                                    | unknown   | unknown                | CdiI24 | VIMKLERNPDEFLRSDVRYEHLTTEVQYKGEV<br>EAQINQDKGENLELEIFADLKDVAIVRPLDDFL<br>ESLRLARNLSLND                                                                                                                               |
| TD09 | CT25 | NEALVNSLAKQYASLPIDDKKGLLIMSSQLIGVLAASTQGDADAKSLQTGAWVAG<br>NATQHNYLSHWQEEKKRQEVDCGCKDKQLCTGIEAKWAIISAQQDVGIVVGVGGG<br>IGLSTAETAAGVYVYELVKNWRETYAALEQLATSPEFRQQFGDNYLKGLEERAAPLT<br>QAYEDAGWQGSVTAAGVEGGRFAEELVGLVAVKGAQITAKLPTAANKLNVAIAE<br>SPVSGMSLQAGVLDLGRGGGKATAGKVADEFIPPMERPFPRVNPPEPP<br>GEGRLPYEASRAGVQAKLAVKTELENATAVSDIIPKSAVRGNVLDHVVSSTKN<br>STVSLRVLPGKGYEFTDILSEKSKF                                                                                                    | unknown   | unknown                | CdiI25 | VKLIAGLSAQSCREELSKSWGGLRESGNQFSL<br>ADRLGLIGSFAVLSWTPQAEADLYTLVNGSEV<br>WLEVSRSNCEVDFQTTVSKYEYERSLRSRQRIK<br>LAVALDLARQH                                                                                             |
| TD09 | CT26 | NEALVNSLAKQYASLPIDDKKGLLIMSSQLIGVLAASTQGDADAKSLQTGAWVAG<br>NATQHNYLSHWQEEKKRQEVDCGCKDKQLCTGIEAKWAIISAQQDVGIVVGVGGG<br>IGLSTAETAAGVYVYELVKNWRETYAALEQLATSPEFRQQFGDNYLKGLEERAAPLT<br>QAYEDAGWQGSVTAAGVEGGRFAEELVGLVAVKGAQITAKLPTAANKLNVAIAE<br>SPVSGMSLQAGVLDLGRGGGKATAGKVADEFIPPMERPFPRVNPPEPP<br>GEGRLPYEASRAGVQAKLAVKTELENATAVSDIIPKSAVRGNVLDHVVSSTKN<br>STVSLRVLPGKGYEFTDILSEKSKF                                                                                                    | pfam14424 | Deaminase              | CdiI26 | MEERVTYGIERAWFLGSSYNYCRVKNLHQPWVE<br>GESEVGYASELNSFDLPIEKLMLVLELILSA<br>GRSSDKVKRYHLDIHLGLLEIKLSSVLDLPSD<br>EAAELRDLRVLGLY                                                                                           |
| TD09 | CT27 | NEALVNSLAKQYASLPIDDKKGLLIMSSQLIGVLAASTQGDADAKSLQTGAWVAG<br>NATQHNYLSHWQEEKKRQEVDCGCKDKQLCTGIEAKWAIISAQQDVGIVVGVGGG<br>IGLSTAETAAGVYVYELVKNWRETYAALEQLATSPEFRQQFGDNYLKGLEERAAPLT<br>QAYEDAGWQGSVTAAGVEGGRFAEELVGLVAVKGAQITAKLPTAANKLNVAIAE<br>SPVSGMSLQAGVLDLGRGGGKATAGKVADEFIPPMERPFPRVNPPEPP<br>GEGRLPYEASRAGVQAKLAVKTELENATAVSDIIPKSAVRGNVLDHVVSSTKN<br>STVSLRVLPGKGYEFTDILSEKSKF                                                                                                    | cd00607   | RNase                  | CdiI27 | LRVTSLSIKYYESMPSYSAAEVYVVRVDPGISVP<br>DELLKALYLLWPGYGFNWDALYCLNDFEWI<br>PCKKIVVHERLNFNFAEDLKIYLEILRDAVASV<br>SGSEAEHEVFFRESQCRVESILAS                                                                                |
| TD09 | CT28 | NEALVNSLAKQYASLPIDDKKGLLIMSSQLIGVLAASTQGDADAKSLQTGAWVAG<br>NATQHNYLSHWQEEKKRQEVDCGCKDKQLCTGIEAKWAIISAQQDVGIVVGVGGG<br>IGLSTAETAAGVYVYELVKNWRETYAALEQLATSPEFRQQFGDNYLKGLEERAAPLT<br>QAYEDAGWQGSVTAAGVEGGRFAEELVGLVAVKGAQITAKLPTAANKLNVAIAE<br>SPVSGMSLQAGVLDLGRGGGKATAGKVADEFIPPMERPFPRVNPPEPP<br>GEGRLPYEASRAGVQAKLAVKTELENATAVSDIIPKSAVRGNVLDHVVSSTKN<br>STVSLRVLPGKGYEFTDILSEKSKF                                                                                                    | cd16400   | Nuclease               | CdiI28 | MTQWQLLADLDWGGEKNICFFVHSGACFWVDDK<br>FNVSLDAEKDYRAYLDKGIHQEQYASACMTFRG<br>GNLKLTAENFLYRABERWVLSRDLKDMFVCG<br>LDLSESLHGRIDYLYSGVLSASFYHDANTVAS<br>RLPMFVFNDRKILYMHMDCNRAHELEYSDWLKA<br>CSDFCHLVPDRERYVWLEGMVYKRYFLQSA |

|      |      |                                                                                                                                                                                                                                                                                                                                                                                                                                                |           |           |        |                                                                                                                                                                                |
|------|------|------------------------------------------------------------------------------------------------------------------------------------------------------------------------------------------------------------------------------------------------------------------------------------------------------------------------------------------------------------------------------------------------------------------------------------------------|-----------|-----------|--------|--------------------------------------------------------------------------------------------------------------------------------------------------------------------------------|
| TD9  | CT29 | NEALVDSLAKQYASLPIDDKKGLLIMSSQLIGVLAASTQGDADAKSLQTGAWVAG<br>NATQNYFLNHVNEERWKSQKACQGGDEAACGRADAWKLDRLDLALMTACSTG<br>QASTCSALRQEAWKAQSLQASWSPREARQYAVQMNPELRAYTIESELSIN<br>QVNNPI TAGDSKRRLAKALASFGSDPVPVYGDTRKAFSEAQDPFYAMAGVLVPGA<br>GDAAQKVLKAKKLFQEGKVAESADLVEGLTKGVKNSSAAKGFIPAERTGLNFEE<br>KVKNAKAGYVDELVARQKPKDGSVVDKFAQSDLVARYSPDGNLYIDWYGTTV<br>SGKVGSEMISRAIEAVGANKVKTVAQGLKDNLDFAFGAGSSRGLSKEQAVWMP<br>LGKTMNSLGFTEVEVHGASVKFLHLE     | unknown   | unknown   | CdiI29 | MDKVDIIRELIRLGKVKVLEFVEGSDSVYISDAS<br>EGVQHPDLRRIIVMMVHHLRFVSEFGDALETQC<br>KDGKYLSPHYEPEAWLSAGAPIADKDLRAYLK<br>ENFL                                                            |
| TD9  | CT30 | NEALVDSLAKQYASLPIDDKKGLLIMSSQLIGVLAASTQGDADAKSLQTGAWVAG<br>NATQNNYIEHSDVLAFAEDMRSCGKDEGCKDKWEKERYSDSKLNQEAQNTY<br>PLRAKEKRLQIVESMDTLVSIQCVTSRCESEYKTELEQSDVSYIHLKVLDEWAP<br>TLDRLALIGGAAAGQIDSVKRPMPPEVLAQVQKAVDYLAALKATGASGKPL<br>VSKGSEVTPFVIQKALQGDVRIITAGAVSLPVAQRYVDRLLKGDVAPAIKMDGNV<br>IVDGNHRYIAAKILGRNLDVTPGSLSPNKVHQTKPVSLEKIDQVDWGNK                                                                                                | unknown   | unknown   | CdiI30 | MITIFFETGEKLDLPLASFAKNSLGSLELHRAIF<br>DGLDLSEADFTASNLRNASFNHALLGGAVMNSAA<br>LMNASFVDAIMKGVKLVDMMAAYADPFGADLSMA<br>SLKNADIGGNSFINSLRDVNDIVARIDGAVFRG<br>AIYNDRTIWPKGFIPENFGAIGK |
| TD09 | CT31 | NEALVDSLAKQYASLPIDDKKGLLIMSSQLIGVLAASTQGDADAKSLQTGAWVAG<br>NATQHNYLSHWQEEKKRQEVGDCCKDKLCKTGIEAKWAIISAQQDVGIVVGVGGG<br>IGLSTAETAVGVYELVKNWRETYAALEQLATSPEFRQQFGDNYLKGLEERAFLT<br>QAYEDAGWQGSVTAGVEGGRFAELVGVLTAVKGAQITAKLPTAANKLVNAIAE<br>SPVSGMSSQLGAVGDLGRLGGGAKTASAGGQTASTLPKNFGESVLEHNTQIGV<br>RNSKAGTISGANNDAFLESVEITGAKVSNKIDARFPFIVEYSYQLPRTNTKGE<br>FIGGYKSVSTKTYDPIKILPDSKADMSRAAVQAESVFKANPALRETSIKVDGY<br>YFQVTRRGCAEFVTVGRVTAAGGLRS | unknown   | unknown   | CdiI31 | MGYTVSSGRCDQALTSSATASVTEEIRLGDTSAP<br>YISCKCAWISRTVMPRAYSERILSSKPVQVWVCF<br>SMICGSKVPCRSRGTSMGSSPNSPLSFLFLKPLR<br>VLPILQLTG                                                    |
| TD09 | CT32 | NEALVDSLAKQYASLPIDDKKGLLIMSSQLIGVLAASTQGDADAKSLQTGAWVAG<br>NATQHNYLSHWQEEKKRQEVGDCCKDKLCKTGIEAKWAIISAQQDVGIVVGVGGG<br>IGLSTAETAVGVYELVKNWRETYAALEQLATSPEFRQQFGDNYLKGLEERAFLT<br>QAYEDAGWQGSVTAGVEGGRFAELVGVLTAVKGAQITAKLPTAANKLVNAIAE<br>SPVSGMSSQLGAVGDLGRLGGGKGYVILSHEAKHILYGDKPGSGHHLWFGP<br>AGKTVFPQNSADKI VHEVGDITATSPTKWAYAQGTGGVYTSKGDPAKWVAEVR<br>DGMRRVYQATGKVIITAFPDNAPIPYKPKIK                                                      | pfam14436 | Nuclease  | CdiI32 | MYADRIVKFGERFQGRLESTLLQALDYVGYNEE<br>SLAFEVLDCHICEYDVSIITDEEYREAVQLALDMG<br>FDLEEGFPKHLKGLKS                                                                                   |
| TD09 | CT33 | NEALVDSLAKQYASLPIDDKKGLLIMSSQLIGVLAASTQGDADAKSLQTGAWVAG<br>NATQHNYLSHWQEEKKRQEVGDCCKDKLCKTGIEAKWAIISAQQDVGIVVGVGGG<br>IGLSTAETAVGVYELVKNWRETYAALEQLATSPEFRQQFGDNYLKGLEERAFLT<br>QAYEDAGWQGSVTAGVEGGRFAELVGVLTAVKGAQITAKLPTAANKLVNAIAE<br>SPVSGMSSQLGAVGDLGRLGGGKGYVILSHEAKHILYGDKPGSGHHLWFGP<br>AGKTVFPQNSADKI VHEVGDITATSPTKWAYAQGTGGVYTSKGDPAKWVAEVR<br>DGMRRVYQATGKVIITAFPDNAPIPYKPKIK                                                      | cd13442   | tRNase    | CdiI33 | MSITMALEIQVGTALIESIATLSLSEGESLGD<br>RLDANFESSGQCFVRSLEQPEGI VAEGCSMSWK<br>VGLRGAFHCRGNSLSESVVDIKLFLQELSLNIEF<br>GFVLSFQYESIYAIRSDGLSFKRSMID                                    |
| TD09 | CT34 | NEALVDSLAKQYASLPIDDKKGLLIMSSQLIGVLAASTQGDADAKSLQTGAWVAG<br>NATQHNYLSHWQEEKKRQEVGDCCKDKLCKTGIEAKWAIISAQQDVGIVVGVGGG<br>IGLSTAETAVGVYELVKNWRETYAALEQLATSPEFRQQFGDNYLKGLEERAFLT<br>QAYEDAGWQGSVTAGVEGGRFAELVGVLTAVKGAQITAKLPTAANKLVNAIAE<br>SPVSGMSSQLGAVGDLGRLGGGKGYVILSHEAKHILYGDKPGSGHHLWFGP<br>AGKTVFPQNSADKI VHEVGDITATSPTKWAYAQGTGGVYTSKGDPAKWVAEVR<br>DGMRRVYQATGKVIITAFPDNAPIPYKPKIK                                                      | pfam14436 | Nuclease  | CdiI34 | VLVKELFGQPYSESDPVVWVKGVDFRMYDDGYFI<br>EALGYIVKRWGFTDGYCNFPDENSPFDEEHEFE<br>GVFEYSYGPDKDEDTIVVEAVCSKFI RLACEKY<br>LQRHPDETEKVKELLDKLSF                                          |
| TD05 | CT35 | NEALVAKLDQAFKSLSPENREAMVTMGSQVLGVAAVRDPDATGKALESAAWVA<br>KNSTQYFNLNHQVDADLDNALQKCKSQGNCRQVEEFKARSDENRRRLNCCVAVG<br>NCAEIRAEIDAGSTALNELVARQETANPQGSDDSDIAYGFLMGRNVWDWTQGLH<br>LEQTANLWNNQPNQWQKEVAGYLDQTFGNPFGIGVPMGGAAGKVSAKALMNAK<br>AGELPKGEVAPGKANLPTI GALADAEAGMPYTHPVKLGAKLSSVSHASGVELPK<br>SQQMIANFETAGYPSKPVVPSSTGNVVGTYTLPDGSRVRVMQADGRSPQRAS<br>ENANGGPI DPTTGKPPQPKGLSKAERKQWIRERTHIEQVD                                             | cd07562   | Protease  | CdiI35 | MPDLRLRLVIFLPLCIKTVEWDGSLVISGDNWS<br>FITSSAWRISQKELLFACWDDQVTRTEGLVGL<br>SIVDMSSWTSQPIDPSFILSDGRRLDVFCSFS<br>EPWVMNLPDINSVIVGNS                                                |
| TD03 | CT36 | NEAVVAAFGEKIFPGEQHEKLLGMTSNLIGMTVAAAAGGDEKAQEKAGWVAQAT<br>LNNYLFHEEMEMANKIKACGGDQNCQPIREHYADLDEQRNKAFPELCLANLTS<br>CVQIANRLSABEQLNVDLMESLRNAQYNGIAGAI G IAFIPSNRVSADQATLEVVR<br>QTGGTAEFEKAVLAMLGAGVAGVGPKTVEKATNALDRLKALQAAGTVPAEVPA<br>SVIAKEGLYNELRAAQARDALIGTTLPGAAPVTVTAEGSVGGKVLVDVNTQARTP<br>AMVAENKPTLIADLLPLGSPNSMANAHAEIAVIQRAFAGITKQDQMAIIVRGE<br>RVCSFCRSNNILAAADRSLNLSKLVAEESGKIFWTWRIGIEGWK                                      | pfam14437 | Deaminase | CdiI36 | MFDELEKPICLELCYLDRSNSPPAVIVENPVWE<br>SISEGIRKVVYKGGFVRLSVNEPQSSLVRELSD<br>SLPGRFKLAVLTSPPKKEYLEWVEFGDPPFRG<br>VVRFGDEDFDRVTCADISIAEAVFKELYETGGL<br>DVGLAQMRSPWPNPK             |
| TD03 | CT37 | NEAVVAAFGEKIFPGEQHEKLLGMTSNLIGMTVAAAAGGDEKAQEKAGWVAQAT<br>LNNYLFHEEMEMANKIKACGGDQNCQPIREHYADLDEQRNKAFPELCLANLTS<br>CVQIANRLSABEQLNVDLMESLRNAQYNGIAGAI G IAFIPSNRVSADQATLEVVR<br>QTGGTAEFEKAVLAMLGAGVAGVGPKTVEKATNALDRLKALQAAGTVPAEVPA<br>SVIAKEGLYNELRAAQARDALIGTTLPGAAPVTVTAEGSVGGKVLVDVNTQARTP<br>AMVSDASKTTLISDLPFGSPNSTMANAHAEIAVIQRAFAGITKQDQMAIIVRGE<br>EBCSFCQSSNTILAAERSGLNLSKLVAEAKTRTTRTRGIDCWR                                      | pfam14437 | Deaminase | CdiI37 | MILDYEDDLEPVLECCGDNSSASSLAVVVEQPVW<br>ESIEKGI VNSFKFGFVVRVIRPKKSFVRQLSM<br>KSLPGRFRINILTRSTNPKEYLEWVEWDESPYR<br>GMIKFGDDDFDRVTCADISIAEAVFKELYETGGL<br>LDVGLSQMRSPWPNPK         |
| TD09 | CT38 | NEALVDSLAKQYASLPIDDKKGLLIMSSQLIGVLAASTQGDADAKSLQTGAWVAG<br>NATQHNYLSHWQEEKKRQEVGDCCKDKLCKTGIEAKWAIISAQQDVGIVVGVGGG<br>IGLSTAETAVGVYELVKNWRETYAALEQLATSPEFRQQFGDNYLKGLEERAFLT<br>QAYEDAGWQGSVTAGVEGGRFAELVGVLTAVKGAQITAKLPTAANKLVNAIAE<br>SPVSGMSSQLGAVGDLGRLGGGAKTASADSLINLASNQRSQHILLGDATGGGH<br>LWPGAPKTAFFPASWNGDKVMHNVDLADPKASWTQTLTKGKGAQFTTKGKPVW<br>AVEGVRDGNVIRVIEPHGEGIIITAYPK                                                        | pfam14436 | Nuclease  | CdiI38 | MREPEKIIQAVLEESIGCGDDTERNVCELLACG<br>EPGVALEVFCSQLVEFDIAIPLEKKEQLTVAAGV<br>MGMEIEELQDLKSL                                                                                      |
| TD09 | CT39 | NEALVDSLAKQYASLPIDDKKGLLIMSSQLIGVLAASTQGDADAKSLQTGAWVAG<br>NATQHNYLSHWQEEKKRQEVGDCCKDKLCKTGIEAKWAIISAQQDVGIVVGVGGG<br>IGLSTAETAVGVYELVKNWRETYAALEQLATSPEFRQQFGDNYLKGLEERAFLT<br>QAYEDAGWQGSVTAGVEGGRFAELVGVLTAVKGAQITAKLPTAANKLVNAIAE<br>SPVSGMSSQLGAVGDLGRLGGGAKTPTTPTVTAEGRI GNSVFTDVTNQTARPAQA<br>NPNQPTLIADRVDAKIAANGKPHPNMADAHAEIGVIAQYVNAKGTGADMALK<br>VEGKAVCSYCRGDIAAAEEKAGLNSLQINEVTTGKTLVYKQPMRSLRELE                                | pfam14437 | Deaminase | CdiI39 | MAAFSLSVVFGVAQAAGGRNRFPSWDDVLSCLE<br>LIREGKGSVTELEISKTAVGPQSLQVQSEGGKYV<br>VSLGEDDDGVYIVRSYRNLKQGIPEFVLDGVWD<br>GVLICDEFSILKNI FEFBFLTGDSVKELLN                                |

TD = Translocation Domain, CT = C-terminal domain

## METHODS

Complete assemblies for all *P. aeruginosa* NCBI reference genomes included in this study were accessed through NCBI (<https://www.ncbi.nlm.nih.gov/refseq/>) and are listed in Supplementary Table 1. Genome assemblies of the *P. aeruginosa* PABL strains can be accessed through NCBI (<https://www.ncbi.nlm.nih.gov/bioproject/PRJNA485889/>). The *cdiA1* and *cdiA2* genes of all *P. aeruginosa* strains were identified by BLASTn search using the PAO1 query sequences of PA0041 (*cdiA1*) and PA2462 (*cdiA2*). Sequences of the *cdi* loci from all PABL strains were deposited in NCBI and are listed in Supplementary Table 2. Sequences were aligned using Clustal Omega (1) and annotated protein domains were identified using the CD-search function of the Conserved Domain Database (2). Amino acid frequency plots were determined using a 40-amino-acid sliding window and visualized in R with the ggplot2 package (3). kSNP3 was used to determine phylogenetic relationships between strains and construct maximum likelihood trees (4). Trees were visualized in R using ggtree (5).

## Supplemental References

1. **Sievers F, Wilm A, Dineen D, Gibson TJ, Karplus K, Li W, Lopez R, McWilliam H, Remmert M, Soding J, Thompson JD, Higgins DG.** 2011. Fast, scalable generation of high-quality protein multiple sequence alignments using Clustal Omega. *Molecular systems biology* **7**:539.
2. **Marchler-Bauer A, Derbyshire MK, Gonzales NR, Lu S, Chitsaz F, Geer LY, Geer RC, He J, Gwadz M, Hurwitz DI, Lanczycki CJ, Lu F, Marchler GH, Song JS, Thanki N, Wang Z, Yamashita RA, Zhang D, Zheng C, Bryant SH.** 2015. CDD: NCBI's conserved domain database. *Nucleic Acids Res* **43**:D222-226.
3. **Wickham H.** 2016. ggplot2: Elegant Graphics for Data Analysis. Springer-Verlag New York.
4. **Gardner SN, Slezak T, Hall BG.** 2015. kSNP3.0: SNP detection and phylogenetic analysis of genomes without genome alignment or reference genome. *Bioinformatics* **31**:2877-2878.
5. **Yu G, Smith DK, Zhu H, Guan Y, Lam TTY.** 2017. GGTree: an R package for visualization and annotation of phylogenetic trees with their covariates and other associated data. *Methods in Ecology and Evolution* **8**:28-36.
